# Supplementary material for: 9-Borafluoren-9-yl and diphenylboron tetracoordinate complexes of F- and Cl-substituted 8-quinolinolato ligands: synthesis, molecular and electronic structures, fluorescence and application in OLED devices
Source: Royal Society of Chemistry journal article supplement (doi:10.1039/d3dt00496a), 2023-01-01
Supplement: d3dt00496a2.pdf [file d3dt00496a2.pdf]

*Supporting Information for*

**9-Borafluoren-9-yl and diphenylboron tetracoordinate complexes  
of F- and Cl-substituted 8-quinolinolato ligands: synthesis,  
molecular and electronic structures, fluorescence and application  
in OLED devices**

Carina B. Fialho,<sup>a</sup> Tiago F. C. Cruz,<sup>a</sup> Ana I. Rodrigues,<sup>a</sup> Maria José Calhorda,<sup>b</sup> Luís F. Vieira  
Ferreira,<sup>c</sup> Piotr Pander,<sup>d,e,f</sup> Fernando B. Dias,<sup>f</sup> Jorge Morgado,<sup>g,h</sup> António L. Maçanita,<sup>a</sup>  
Pedro T. Gomes\*<sup>a</sup>

<sup>a</sup> *Centro de Química Estrutural, Departamento de Engenharia Química, Instituto Superior Técnico, Universidade de Lisboa, Av. Rovisco Pais, 1049-001 Lisboa, Portugal.*

*E-mail: pedro.t.gomes@tecnico.ulisboa.pt*

<sup>b</sup> *BioISI – Instituto de Biosistemas e Ciências Integrativas, Departamento de Química e Bioquímica, Faculdade de Ciências, Universidade de Lisboa, Campo Grande, 1749-016 Lisboa, Portugal.*

<sup>c</sup> *BSIRG – Biospectroscopy and Interfaces Research Group, IBB-Institute for Bioengineering and Biosciences, Instituto Superior Técnico, Universidade de Lisboa, 1049-001 Lisboa, Portugal*

<sup>d</sup> *Faculty of Chemistry, Silesian University of Technology, Strzody 9, 44-100 Gliwice, Poland*

<sup>e</sup> *Centre for Organic and Nanohybrid Electronics, Silesian University of Technology, Konarskiego 22B, 44-100 Gliwice, Poland*

<sup>f</sup> *Department of Physics, Durham University, South Road, Durham DH1 3LE, U.K.*

<sup>g</sup> *Instituto de Telecomunicações, Av. Rovisco Pais, 1049-001 Lisboa, Portugal.*

<sup>h</sup> *Department of Bioengineering, Instituto Superior Técnico, Universidade de Lisboa, Av. Rovisco Pais, 1049-001 Lisboa, Portugal.*

**Table of Contents**

|                                                                                                                                    |     |
|------------------------------------------------------------------------------------------------------------------------------------|-----|
| Crystallographic and molecular structure data of boron complexes <b>3b</b> , <b>3c</b> , <b>3d</b> , <b>4b</b> and <b>4d</b> ..... | S2  |
| X-ray diffraction structures of complexes <b>3c</b> .....                                                                          | S3  |
| Selected bond lengths and angles for complexes <b>3b</b> , <b>3c</b> , <b>3d</b> , <b>4b</b> and <b>4d</b> .....                   | S4  |
| NMR spectra .....                                                                                                                  | S6  |
| Absorption and emission spectra of complexes <b>3a-d</b> and <b>4a-d</b> in THF solution and in ZEONEX film ....                   | S19 |
| Absorption and emission spectra of complexes <b>3a</b> and <b>4a</b> in solvents of different polarity .....                       | S21 |
| Computational studies .....                                                                                                        | S23 |
| Transient emission spectra of complexes <b>3b</b> , <b>3c</b> , <b>4b</b> and <b>4c</b> in solid films .....                       | S28 |
| Electroluminescent devices .....                                                                                                   | S29 |

## Crystallographic and molecular structure data of boron complexes **3b**, **3c**, **3d**, **4b** and **4d**

**Table S1** Crystallographic data for boron complexes **3b**, **3c**, **3d**, **4b** and **4d**.

|                                         | <b>3b</b>                                                                                   | <b>3c</b>                             | <b>3d</b>                                           | <b>4b</b>                                                                     | <b>4d</b>                                           |
|-----------------------------------------|---------------------------------------------------------------------------------------------|---------------------------------------|-----------------------------------------------------|-------------------------------------------------------------------------------|-----------------------------------------------------|
| Formula                                 | C <sub>42</sub> H <sub>26</sub> B <sub>2</sub> F <sub>2</sub> N <sub>2</sub> O <sub>2</sub> | C <sub>21</sub> H <sub>13</sub> BClNO | C <sub>21</sub> H <sub>12</sub> BCl <sub>2</sub> NO | C <sub>42</sub> H <sub>30</sub> B <sub>2</sub> FN <sub>2</sub> O <sub>3</sub> | C <sub>21</sub> H <sub>14</sub> BCl <sub>2</sub> NO |
| M (g mol <sup>-1</sup> )                | 650.27                                                                                      | 341.58                                | 376.03                                              | 651.30                                                                        | 378.04                                              |
| λ (Å)                                   | 0.71073                                                                                     | 0.71073                               | 0.71073                                             | 0.71073                                                                       | 0.71073                                             |
| T (K)                                   | 150(2)                                                                                      | 150(2)                                | 150(2)                                              | 150(2)                                                                        | 150(2)                                              |
| Crystal system                          | Monoclinic                                                                                  | Monoclinic                            | Monoclinic                                          | Monoclinic                                                                    | Monoclinic                                          |
| Space group                             | P2 <sub>1</sub> /c                                                                          | P2 <sub>1</sub> /c                    | P2 <sub>1</sub> /n                                  | P2 <sub>1</sub> /c                                                            | P2 <sub>1</sub> /n                                  |
| a (Å)                                   | 11.2348(6)                                                                                  | 15.228(16)                            | 9.903(2)                                            | 10.8807(6)                                                                    | 8.9037(7)                                           |
| b (Å)                                   | 14.9120(8)                                                                                  | 7.863(8)                              | 13.273(2)                                           | 28.8313(15)                                                                   | 17.9932(13)                                         |
| c (Å)                                   | 18.6487(10)                                                                                 | 13.804(14)                            | 13.425(3)                                           | 11.2931(6)                                                                    | 11.0787(8)                                          |
| α (°)                                   | 90                                                                                          | 90                                    | 90                                                  | 90                                                                            | 90                                                  |
| β (°)                                   | 92.236(2)                                                                                   | 96.17(3)                              | 103.851(5)                                          | 114.236(2)                                                                    | 102.586(4)                                          |
| γ (°)                                   | 90                                                                                          | 90                                    | 90                                                  | 90                                                                            | 90                                                  |
| V (Å <sup>3</sup> )                     | 3121.9(3)                                                                                   | 1643(3)                               | 1713.4(6)                                           | 3230.5(3)                                                                     | 1732.2(2)                                           |
| Z                                       | 4                                                                                           | 4                                     | 4                                                   | 8                                                                             | 4                                                   |
| ρ <sub>calc</sub> (g cm <sup>-3</sup> ) | 1.384                                                                                       | 1.381                                 | 1.458                                               | 1.339                                                                         | 1.450                                               |
| Crystal size (mm)                       | 0.10×0.08×0.08                                                                              | 0.20×0.15×0.15                        | 0.20×0.10×0.10                                      | 0.12×0.10×0.07                                                                | 0.10×0.10×0.05                                      |
| θ <sub>max</sub> (°)                    | 30.173                                                                                      | 25.721                                | 25.821                                              | 27.269                                                                        | 25.791                                              |
| Total data                              | 187527                                                                                      | 3366                                  | 7789                                                | 198612                                                                        | 9992                                                |
| Unique data                             | 9198                                                                                        | 2040                                  | 3145                                                | 7197                                                                          | 3247                                                |
| R <sub>int</sub>                        | 0.2476                                                                                      | 0.1729                                | 0.0566                                              | 0.084                                                                         | 0.0468                                              |
| R [I > 2σ(I)]                           | 0.1694                                                                                      | 0.0854                                | 0.0466                                              | 0.0606                                                                        | 0.0385                                              |
| wR                                      | 0.2149                                                                                      | 0.1361                                | 0.0744                                              | 0.0730                                                                        | 0.0671                                              |
| Goodness of fit                         | 1.149                                                                                       | 0.797                                 | 0.921                                               | 1.122                                                                         | 0.863                                               |
| ρ <sub>min</sub> , ρ <sub>max</sub>     | -0.433, 1.084                                                                               | -0.261, 0.251                         | -0.284, 0.263                                       | -0.274, 0.741                                                                 | -0.256, 0.217                                       |

## X-ray diffraction structures of complexes **3c**

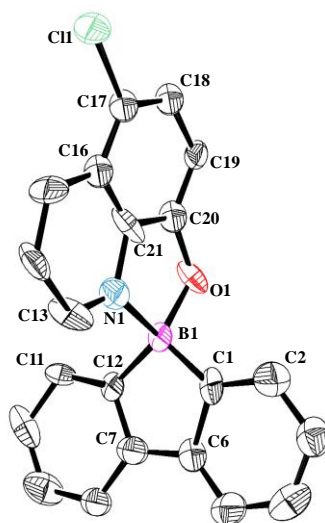

**3c**

**Figure S1** Perspective views of the molecular structures of complex **3c**. The calculated hydrogen atoms were omitted for clarity and the ellipsoids were drawn at the 50% probability level.

## Selected bond lengths and angles for complexes **3b**, **3c**, **3d**, **4b** and **4d**

**Table S2** Selected experimental and calculated (DFT) bond lengths (Å) and angles (°) for complexes **3b**, **3c** and **3d**. Atoms X1/X2 refer to the halogen atoms in 5 and 7 positions of the 8-hydroxyquinolinate, respectively.

|                    | <b>3b</b> (molecule 1) | <b>3b</b> (molecule 2) | <b>3b</b> (DFT) | <b>3c</b> | <b>3d</b> | <b>3d</b> (DFT) |
|--------------------|------------------------|------------------------|-----------------|-----------|-----------|-----------------|
| <i>Lengths (Å)</i> |                        |                        |                 |           |           |                 |
| B(1)-O(1)          | 1.557(8)               | 1.517(7)               | 1.513           | 1.526(12) | 1.527(4)  | 1.518           |
| B(1)-C(12)         | 1.615(8)               | 1.605(8)               | 1.612           | 1.654(14) | 1.599(4)  | 1.608           |
| B(1)-C(1)          | 1.570(9)               | 1.611(8)               | 1.612           | 1.600(16) | 1.606(4)  | 1.609           |
| B(1)-N(1)          | 1.592(8)               | 1.611(7)               | 1.612           | 1.608(13) | 1.613(4)  | 1.609           |
| C(1)-C(2)          | 1.390(9)               | 1.395(8)               | 1.387           | 1.380(13) | 1.385(4)  | 1.386           |
| C(1)-C(6)          | 1.392(9)               | 1.407(8)               | 1.407           | 1.439(12) | 1.402(4)  | 1.407           |
| C(6)-C(7)          | 1.488(8)               | 1.483(8)               | 1.476           | 1.458(14) | 1.480(4)  | 1.476           |
| C(7)-C(12)         | 1.407(8)               | 1.416(7)               | 1.405           | 1.391(12) | 1.403(4)  | 1.406           |
| C(11)-C(12)        | 1.377(8)               | 1.389(8)               | 1.387           | 1.385(13) | 1.390(4)  | 1.396           |
| C(13)-N(1)         | 1.298(7)               | 1.332(6)               | 1.320           | 1.312(11) | 1.322(3)  | 1.320           |
| C(16)-C(21)        | 1.373(8)               | 1.394(7)               | 1.399           | 1.382(12) | 1.395(4)  | 1.398           |
| C(16)-C(17)        | 1.366(9)               | 1.428(9)               | 1.409           | 1.441(13) | 1.411(4)  | 1.416           |
| C(17)-C(18)        | 1.370(8)               | 1.328(12)              | 1.367           | 1.361(13) | 1.368(4)  | 1.372           |
| C(17)-X(1)         | 1.426(7)               | 1.351(8)               | 1.358           | 1.744(10) | 1.726(3)  | 1.738           |
| C(18)-C(19)        | 1.404(8)               | 1.396(12)              | 1.416           | 1.419(13) | 1.412(4)  | 1.413           |
| C(19)-C(20)        | 1.382(7)               | 1.374(8)               | 1.374           | 1.379(12) | 1.367(4)  | 1.376           |
| C(19)-X(2)         | -                      | -                      | -               | -         | 1.727(3)  | 1.730           |
| C(20)-O(1)         | 1.313(7)               | 1.340(7)               | 1.334           | 1.358(11) | 1.327(3)  | 1.323           |
| C(20)-C(21)        | 1.442(7)               | 1.395(7)               | 1.405           | 1.402(13) | 1.400(4)  | 1.405           |
| C(21)-N(1)         | 1.364(7)               | 1.346(6)               | 1.348           | 1.388(11) | 1.359(3)  | 1.350           |
| <i>Angles (°)</i>  |                        |                        |                 |           |           |                 |
| O(1)-B(1)-C(12)    | 113.9(5)               | 117.7(4)               | 116.1           | 119.7(9)  | 113.1(2)  | 115.5           |
| O(1)-B(1)-C(1)     | 113.4(5)               | 116.6(5)               | 116.7           | 114.3(9)  | 113.2(2)  | 116.3           |
| C(12)-B(1)-C(1)    | 102.2(5)               | 100.9(4)               | 100.4           | 101.5(8)  | 100.8(2)  | 100.7           |
| O(1)-B(1)-N(1)     | 98.9(4)                | 98.8(4)                | 99.4            | 99.9(8)   | 99.3(2)   | 99.2            |
| C(12)-B(1)-N(1)    | 113.8(5)               | 111.2(4)               | 112.6           | 108.5(8)  | 117.1(2)  | 112.8           |
| C(1)-B(1)-N(1)     | 115.3(5)               | 112.0(4)               | 112.2           | 113.3(9)  | 114.1(2)  | 113.0           |
| C(2)-C(1)-C(6)     | 118.5(6)               | 119.1(5)               |                 | 118.7(10) | 118.4(3)  |                 |
| C(2)-C(1)-B(1)     | 132.4(6)               | 132.0(5)               |                 | 133.6(9)  | 132.6(3)  |                 |
| C(6)-C(1)-B(1)     | 109.0(5)               | 108.9(5)               |                 | 107.6(9)  | 108.9(2)  |                 |
| C(1)-C(6)-C(7)     | 110.5(5)               | 110.5(5)               |                 | 110.8(9)  | 110.3(2)  |                 |
| C(11)-C(12)-C(7)   | 118.3(5)               | 119.1(5)               |                 | 121.6(9)  | 117.9(3)  |                 |
| C(11)-C(12)-B(1)   | 134.9(5)               | 132.4(5)               |                 | 131.8(9)  | 133.2(3)  |                 |
| C(7)-C(12)-B(1)    | 106.7(5)               | 108.5(5)               |                 | 106.6(9)  | 108.7(2)  |                 |
| C(21)-C(16)-C(17)  | 114.5(6)               | 113.0(6)               |                 | 112.7(9)  | 114.4(2)  |                 |
| C(18)-C(17)-C(16)  | 122.3(6)               | 122.2(7)               |                 | 120.9(9)  | 121.5(3)  |                 |
| C(18)-C(17)-X(1)   | 120.8(6)               | 121.9(7)               |                 | 121.6(8)  | 119.7(2)  |                 |
| C(16)-C(17)-X(1)   | 116.8(5)               | 115.9(7)               |                 | 117.6(8)  | 118.8(2)  |                 |
| C(17)-C(18)-C(19)  | 124.0(6)               | 123.3(6)               |                 | 124.1(10) | 121.3(3)  |                 |
| C(20)-C(19)-C(18)  | 115.9(5)               | 117.6(7)               |                 | 116.6(10) | 119.9(2)  |                 |
| C(20)-C(19)-X(2)   | -                      | -                      |                 | -         | 120.6(2)  |                 |
| C(18)-C(19)-X(2)   | -                      | -                      |                 | -         | 119.4(2)  |                 |
| O(1)-C(20)-C(19)   | 129.1(5)               | 129.7(6)               |                 | 127.5(10) | 130.0(2)  |                 |
| O(1)-C(20)-C(21)   | 113.1(5)               | 112.0(4)               |                 | 114.2(8)  | 113.2(2)  |                 |
| C(19)-C(20)-C(21)  | 117.8(5)               | 118.3(6)               |                 | 118.1(9)  | 116.8(2)  |                 |
| N(1)-C(21)-C(16)   | 126.0(5)               | 123.7(5)               |                 | 124.1(9)  | 123.8(2)  |                 |
| N(1)-C(21)-C(20)   | 108.5(5)               | 110.8(5)               |                 | 108.5(9)  | 110.1(2)  |                 |
| C(16)-C(21)-C(20)  | 125.5(5)               | 125.4(5)               |                 | 127.5(9)  | 126.1(2)  |                 |
| C(13)-N(1)-C(21)   | 119.7(5)               | 119.5(5)               |                 | 117.8(9)  | 119.3(2)  |                 |
| C(13)-N(1)-B(1)    | 130.7(5)               | 132.6(4)               |                 | 133.7(9)  | 133.3(2)  |                 |
| C(21)-N(1)-B(1)    | 109.5(5)               | 107.9(4)               |                 | 108.4(8)  | 107.4(2)  |                 |
| C(20)-O(1)-B(1)    | 110.0(4)               | 110.5(4)               |                 | 108.9(7)  | 109.7(2)  |                 |

**Table S3** Selected experimental and calculated (DFT) bond lengths (Å) and angles (°) for complexes **4b** and **4d**. Atoms X1/X2 refer to the halogen atoms in 5 and 7 positions of the 8-hydroxyquinolate.

|                    | <b>4b</b> (molecule 1) | <b>4b</b> (molecule 2) | <b>4d</b> | <b>4d</b> (DFT) |
|--------------------|------------------------|------------------------|-----------|-----------------|
| <i>Lengths (Å)</i> |                        |                        |           |                 |
| B(1)-O(1)          | 1.538(3)               | 1.530(3)               | 1.544(3)  | 1.532           |
| B(1)-C(12)         | 1.619(3)               | 1.606(3)               | 1.595(4)  | 1.609           |
| B(1)-C(1)          | 1.599(3)               | 1.612(3)               | 1.597(4)  | 1.607           |
| B(1)-N(1)          | 1.628(3)               | 1.631(3)               | 1.623(3)  | 1.623           |
| C(1)-C(2)          | 1.401(3)               | 1.399(3)               | 1.393(3)  | 1.397           |
| C(1)-C(6)          | 1.402(3)               | 1.403(3)               | 1.396(3)  | 1.399           |
| C(7)-C(12)         | 1.396(3)               | 1.401(3)               | 1.399(3)  | 1.399           |
| C(11)-C(12)        | 1.395(3)               | 1.402(3)               | 1.397(3)  | 1.398           |
| C(13)-N(1)         | 1.320(3)               | 1.324(3)               | 1.319(3)  | 1.320           |
| C(16)-C(21)        | 1.400(3)               | 1.398(3)               | 1.396(3)  | 1.399           |
| C(16)-C(17)        | 1.399(3)               | 1.415(3)               | 1.418(3)  | 1.416           |
| C(17)-C(18)        | 1.366(3)               | 1.358(4)               | 1.368(3)  | 1.373           |
| C(17)-X(1)         | 1.367(3)               | 1.363(3)               | 1.732(2)  | 1.738           |
| C(18)-C(19)        | 1.420(3)               | 1.420(3)               | 1.407(3)  | 1.412           |
| C(19)-C(20)        | 1.372(3)               | 1.377(3)               | 1.372(3)  | 1.377           |
| C(19)-X(2)         | -                      | -                      | 1.726(2)  | 1.731           |
| C(20)-O(1)         | 1.330(3)               | 1.340(2)               | 1.326(3)  | 1.320           |
| C(20)-C(21)        | 1.420(3)               | 1.412(3)               | 1.402(3)  | 1.406           |
| C(21)-N(1)         | 1.350(3)               | 1.353(2)               | 1.356(3)  | 1.349           |
| <i>Angles (°)</i>  |                        |                        |           |                 |
| O(1)-B(1)-C(12)    | 107.96(16)             | 111.12(16)             | 108.9(2)  | 110.8           |
| O(1)-B(1)-C(1)     | 111.32(16)             | 110.29(15)             | 111.3(2)  | 111.0           |
| C(12)-B(1)-C(1)    | 117.08(17)             | 117.21(16)             | 116.7(2)  | 115.5           |
| O(1)-B(1)-N(1)     | 98.40(15)              | 98.66(14)              | 98.4(2)   | 98.5            |
| C(12)-B(1)-N(1)    | 109.03(16)             | 108.42(15)             | 111.6(2)  | 110.5           |
| C(1)-B(1)-N(1)     | 111.39(16)             | 109.52(15)             | 108.4(2)  | 109.1           |
| C(2)-C(1)-C(6)     | 117.09(18)             | 116.52(19)             | 116.7(2)  |                 |
| C(2)-C(1)-B(1)     | 120.61(18)             | 123.24(18)             | 122.0(2)  |                 |
| C(6)-C(1)-B(1)     | 122.30(18)             | 120.08(18)             | 121.3(2)  |                 |
| C(11)-C(12)-C(7)   | 116.56(18)             | 116.97(18)             | 116.3(2)  |                 |
| C(11)-C(12)-B(1)   | 122.65(18)             | 120.62(17)             | 125.1(2)  |                 |
| C(7)-C(12)-B(1)    | 120.08(17)             | 122.38(17)             | 118.6(2)  |                 |
| C(21)-C(16)-C(17)  | 114.6(2)               | 113.7(2)               | 114.5(2)  |                 |
| C(18)-C(17)-C(16)  | 121.9(2)               | 122.5(2)               | 121.2(2)  |                 |
| C(18)-C(17)-X(1)   | 121.3(2)               | 120.4(2)               | 120.8(2)  |                 |
| C(16)-C(17)-X(1)   | 116.8(2)               | 117.1(2)               | 118.0(2)  |                 |
| C(17)-C(18)-C(19)  | 122.6(2)               | 122.0(2)               | 121.5(2)  |                 |
| C(20)-C(19)-C(18)  | 117.7(2)               | 118.3(2)               | 120.2(2)  |                 |
| C(20)-C(19)-X(2)   | -                      | -                      | 120.0(2)  |                 |
| C(18)-C(19)-X(2)   | -                      | -                      | 119.8(2)  |                 |
| O(1)-C(20)-C(19)   | 129.6(2)               | 129.8(2)               | 130.0(2)  |                 |
| O(1)-C(20)-C(21)   | 112.00(18)             | 112.31(17)             | 113.4(2)  |                 |
| C(19)-C(20)-C(21)  | 118.4(2)               | 117.9(2)               | 116.6(2)  |                 |
| N(1)-C(21)-C(16)   | 124.47(18)             | 123.65(19)             | 123.9(2)  |                 |
| N(1)-C(21)-C(20)   | 110.76(17)             | 110.70(17)             | 110.2(2)  |                 |
| C(16)-C(21)-C(20)  | 124.77(19)             | 125.64(19)             | 125.9(2)  |                 |
| C(13)-N(1)-C(21)   | 119.18(18)             | 119.49(17)             | 119.3(2)  |                 |
| C(13)-N(1)-B(1)    | 133.13(18)             | 132.76(16)             | 132.7(2)  |                 |
| C(21)-N(1)-B(1)    | 107.52(16)             | 107.74(15)             | 108.0(2)  |                 |
| C(20)-O(1)-B(1)    | 110.35(15)             | 110.55(15)             | 109.9(2)  |                 |

## NMR spectra

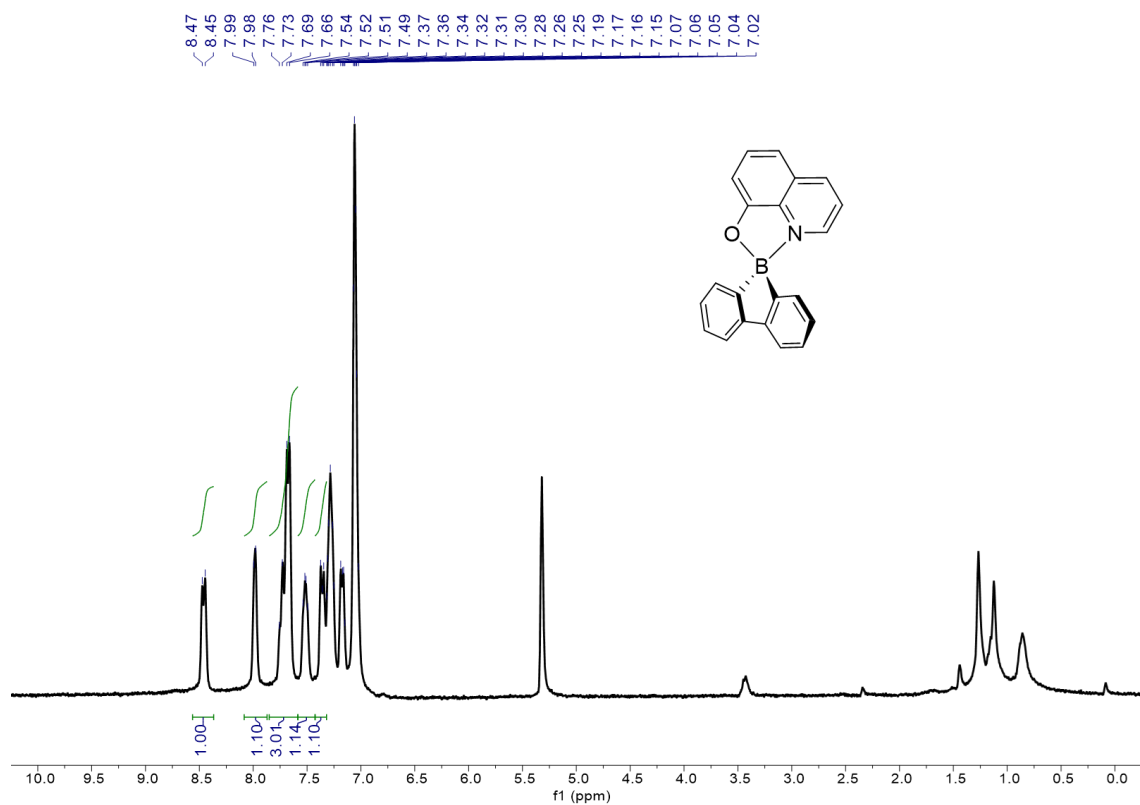

Figure S2  $^1\text{H}$  NMR ( $\text{CD}_2\text{Cl}_2$ , 300 MHz) spectrum of complex **3a**.

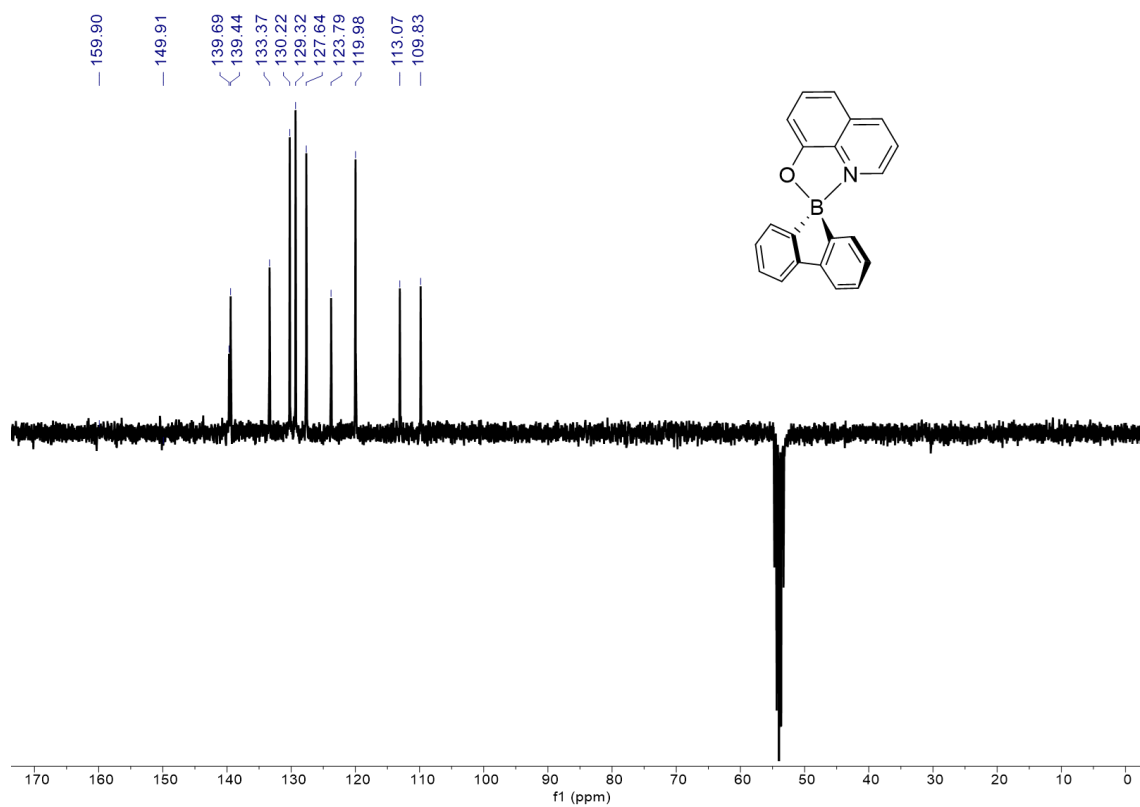

Figure S3  $^{13}\text{C}$  APT NMR ( $\text{CD}_2\text{Cl}_2$ , 75 MHz) spectrum of complex **3a**.

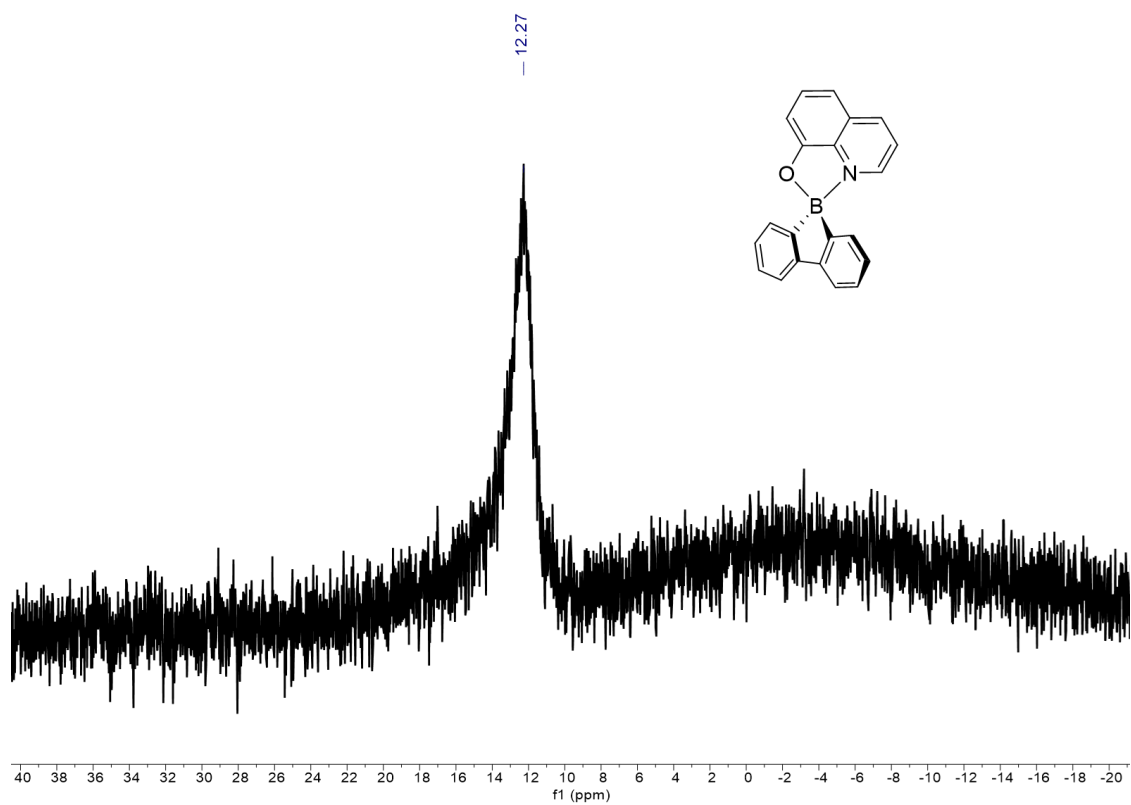

Figure S4  $^{11}\text{B}$  NMR ( $\text{CD}_2\text{Cl}_2$ , 96 MHz) spectrum of complex 3a.

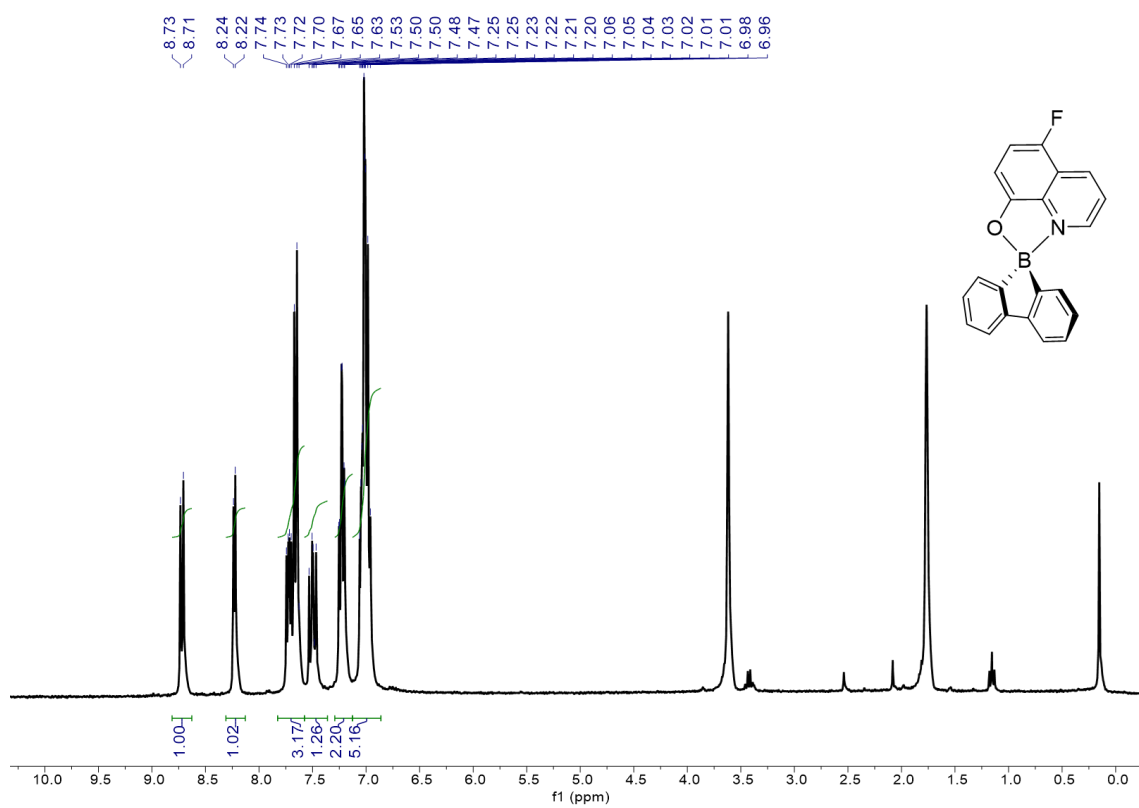

Figure S5  $^1\text{H}$  NMR ( $\text{THF-}d_8$ , 300 MHz) spectrum of complex 3b.

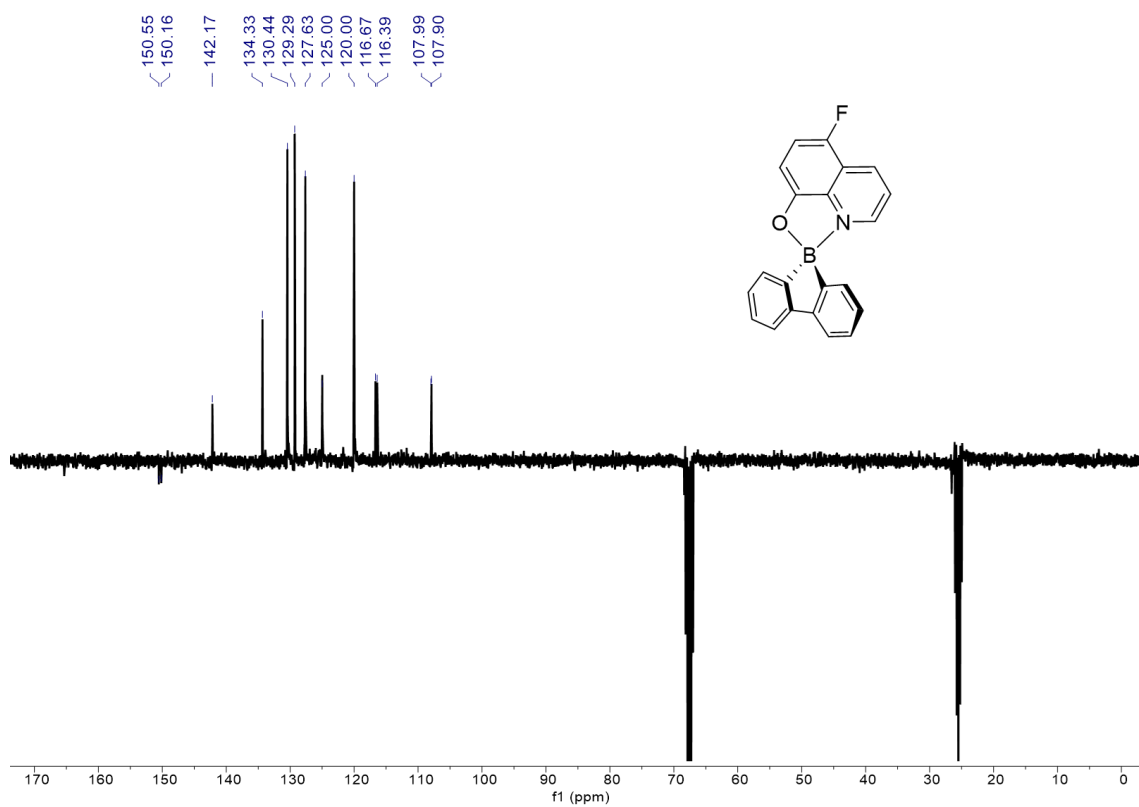

**Figure S6**  $^{13}\text{C}$  APT NMR (THF- $d_8$ , 75 MHz) spectrum of complex **3b**.

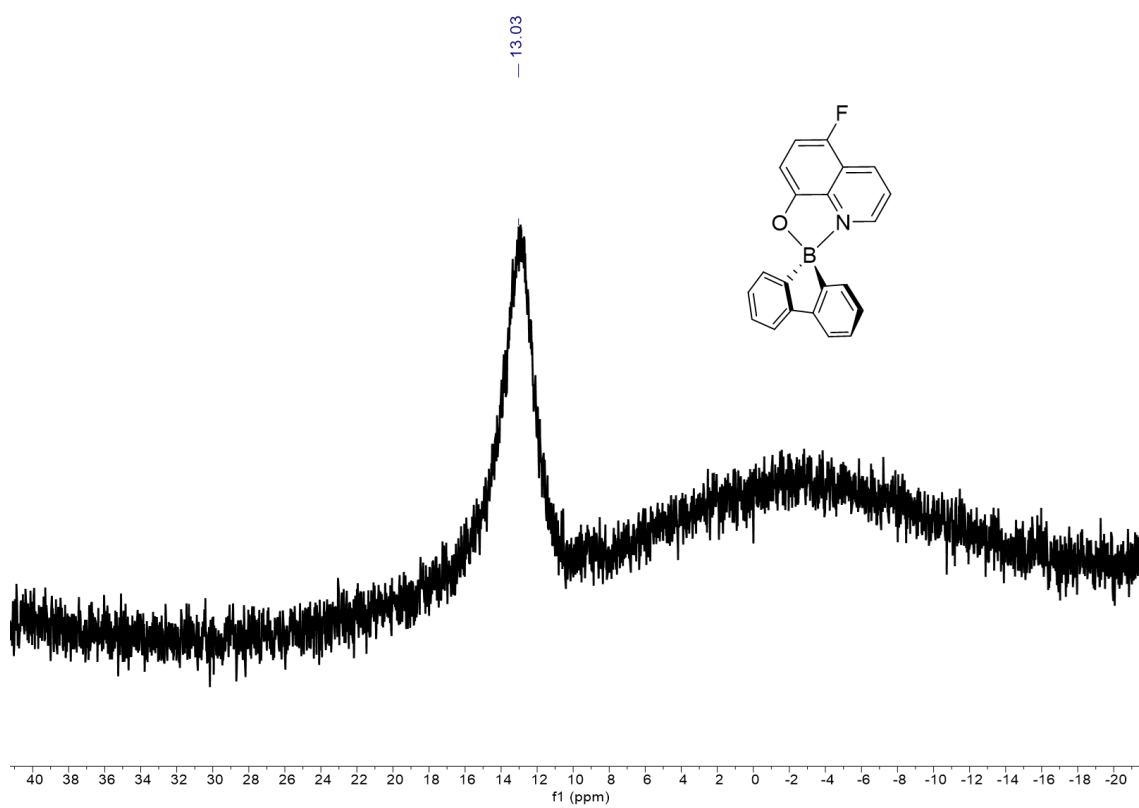

**Figure S7**  $^{11}\text{B}$  NMR (THF- $d_8$ , 96 MHz) spectrum of complex **3b**.



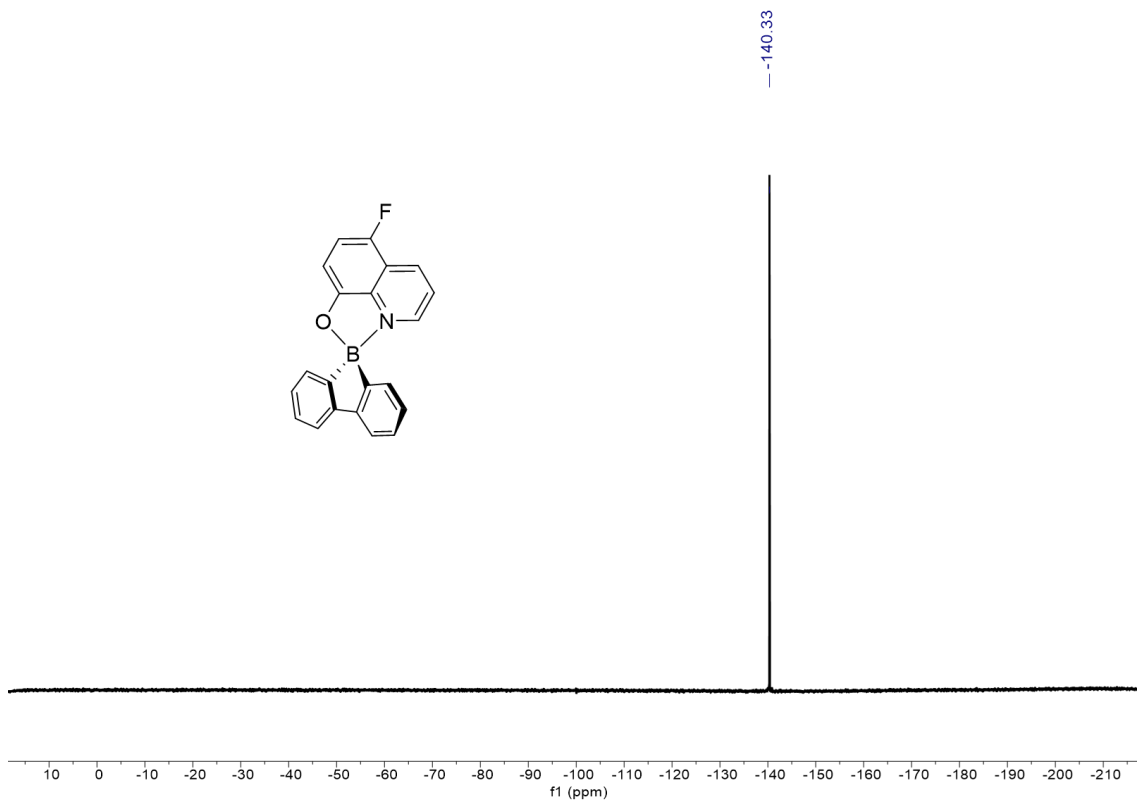

Figure S8  $^{19}\text{F}\{^1\text{H}\}$  NMR (THF-*d*<sub>8</sub>, 282 MHz) spectrum of complex 3b.

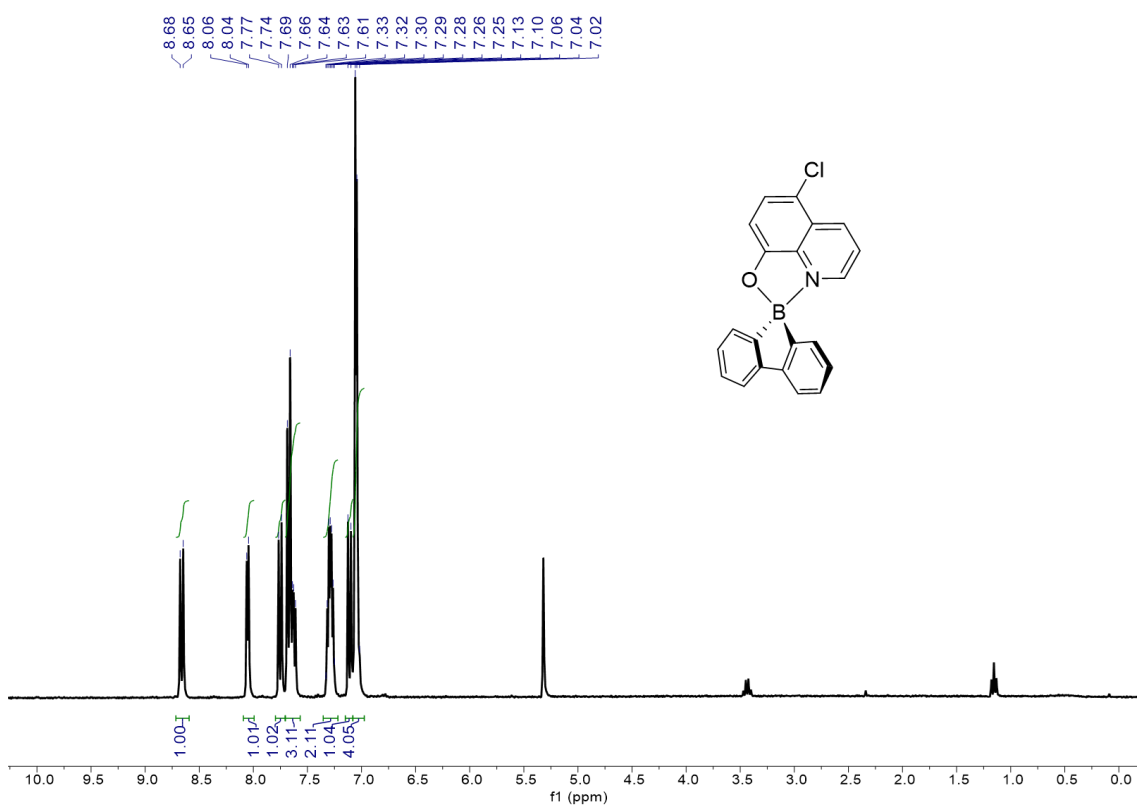

Figure S9  $^1\text{H}$  NMR (CD<sub>2</sub>Cl<sub>2</sub>, 300 MHz) spectrum of complex 3c.

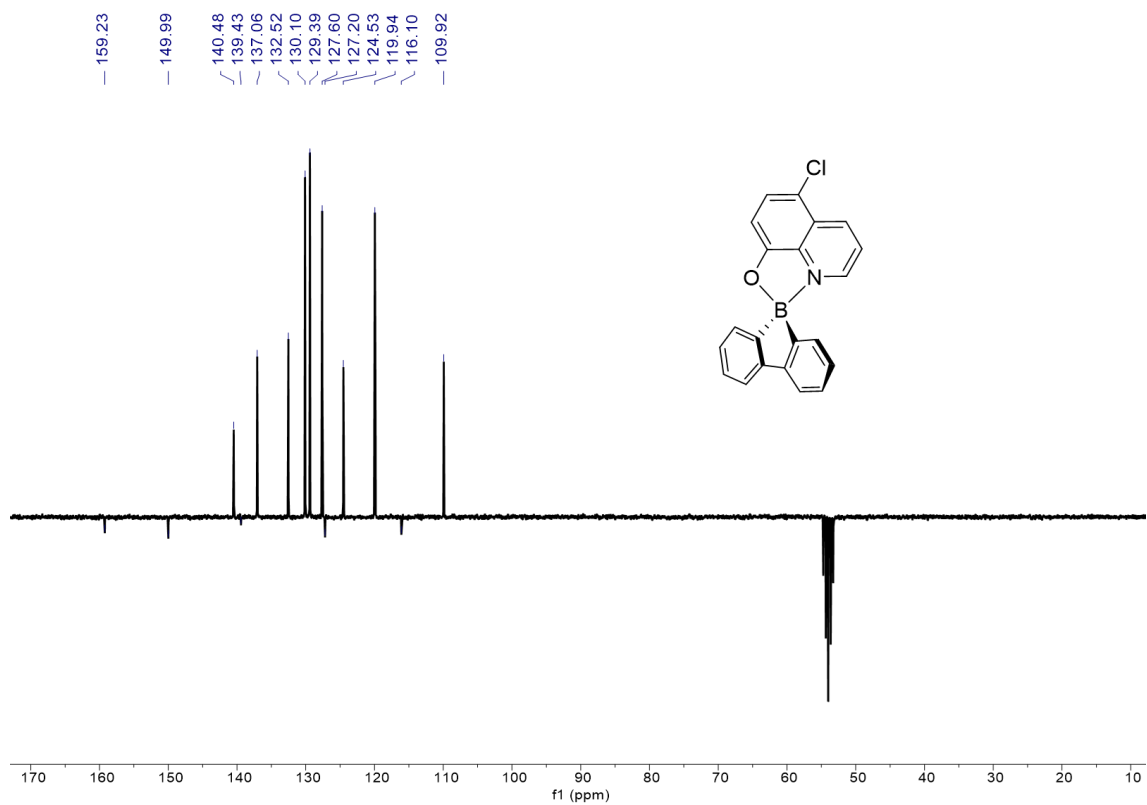

**Figure S10** <sup>13</sup>C APT NMR (CD<sub>2</sub>Cl<sub>2</sub>, 75 MHz) spectrum of complex **3c**.

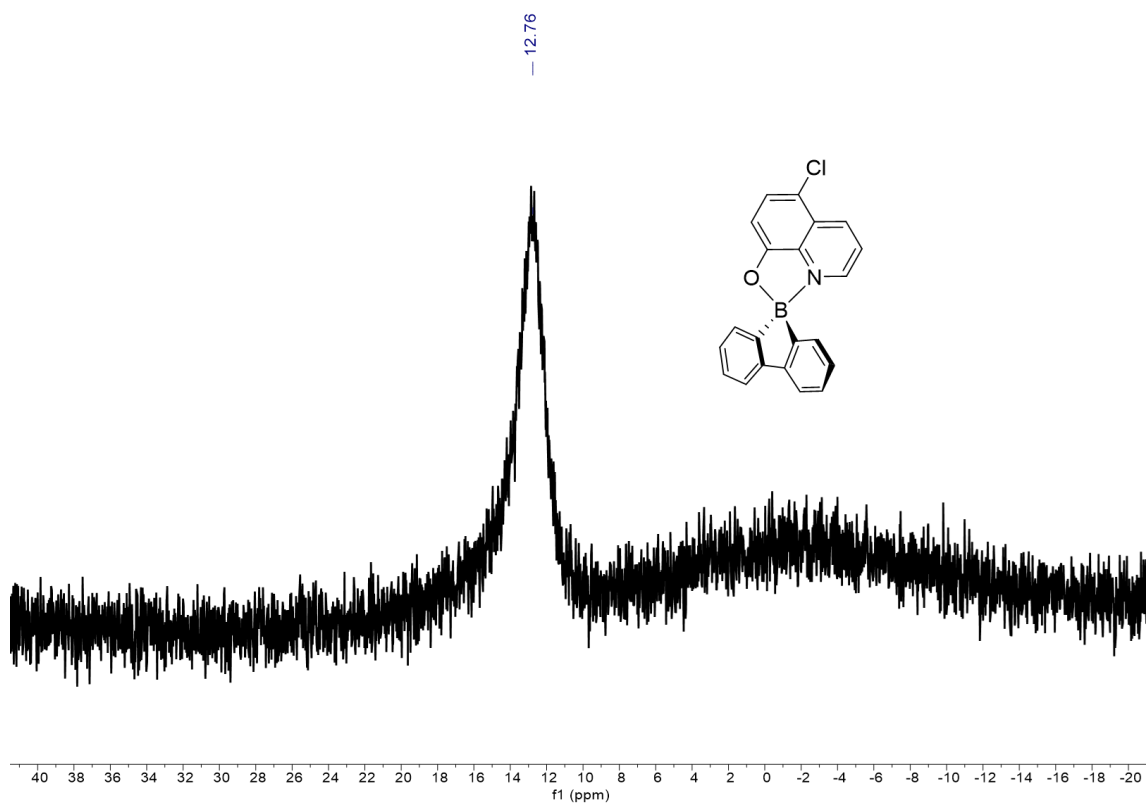

**Figure S11** <sup>11</sup>B NMR (CD<sub>2</sub>Cl<sub>2</sub>, 96 MHz) spectrum of complex **3c**.

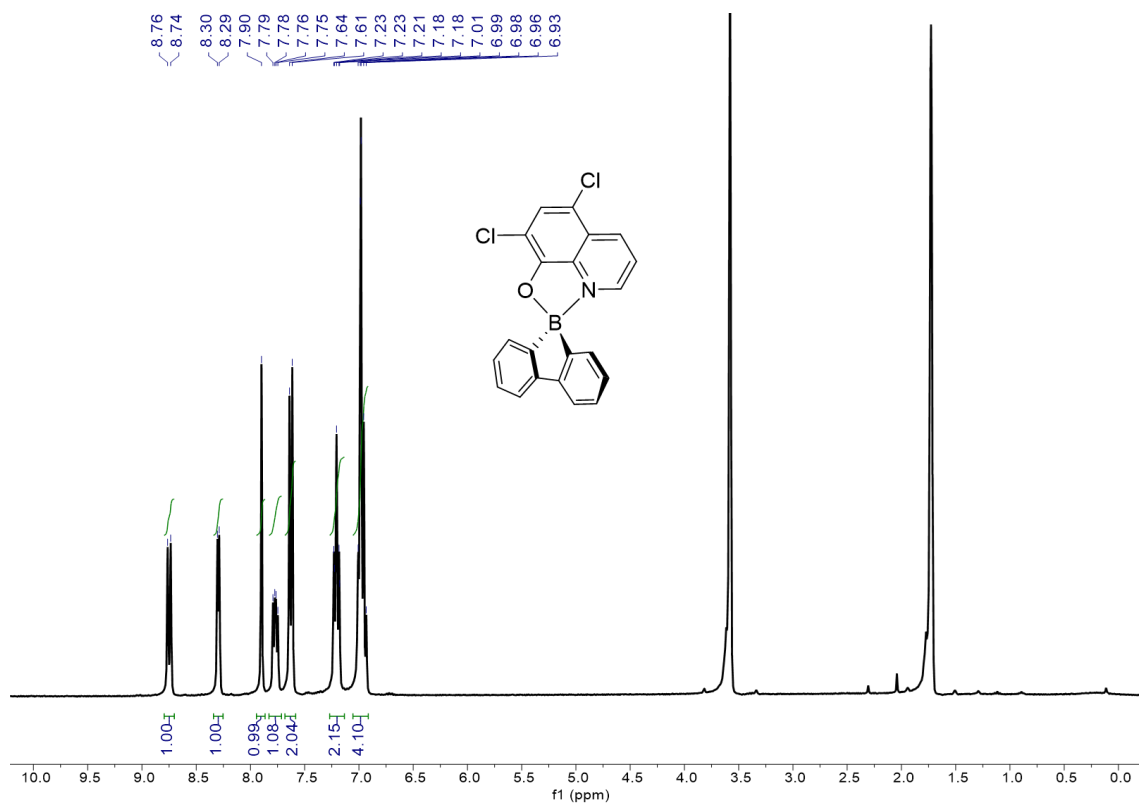

**Figure S13**  $^1\text{H NMR}$  (THF- $d_8$ , 300 MHz) spectrum of complex 3d.

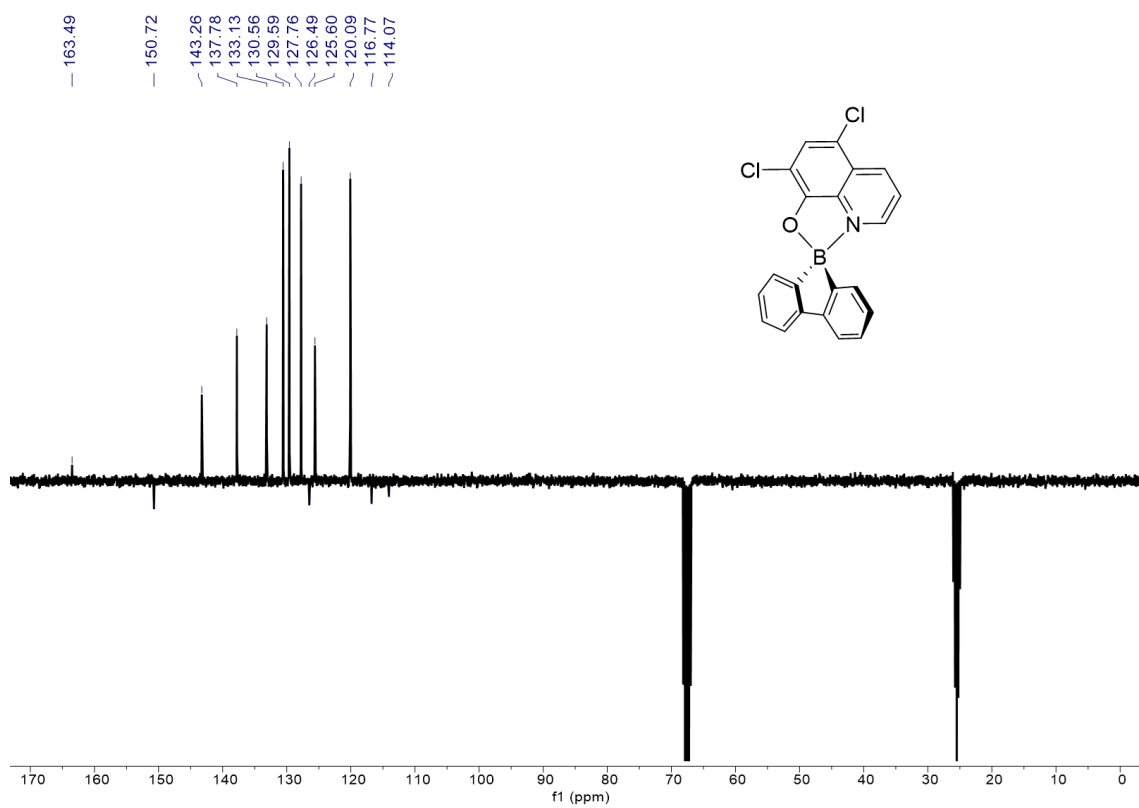

**Figure S13**  $^{13}\text{C APT NMR}$  (THF- $d_8$ , 75 MHz) spectrum of complex 3d.

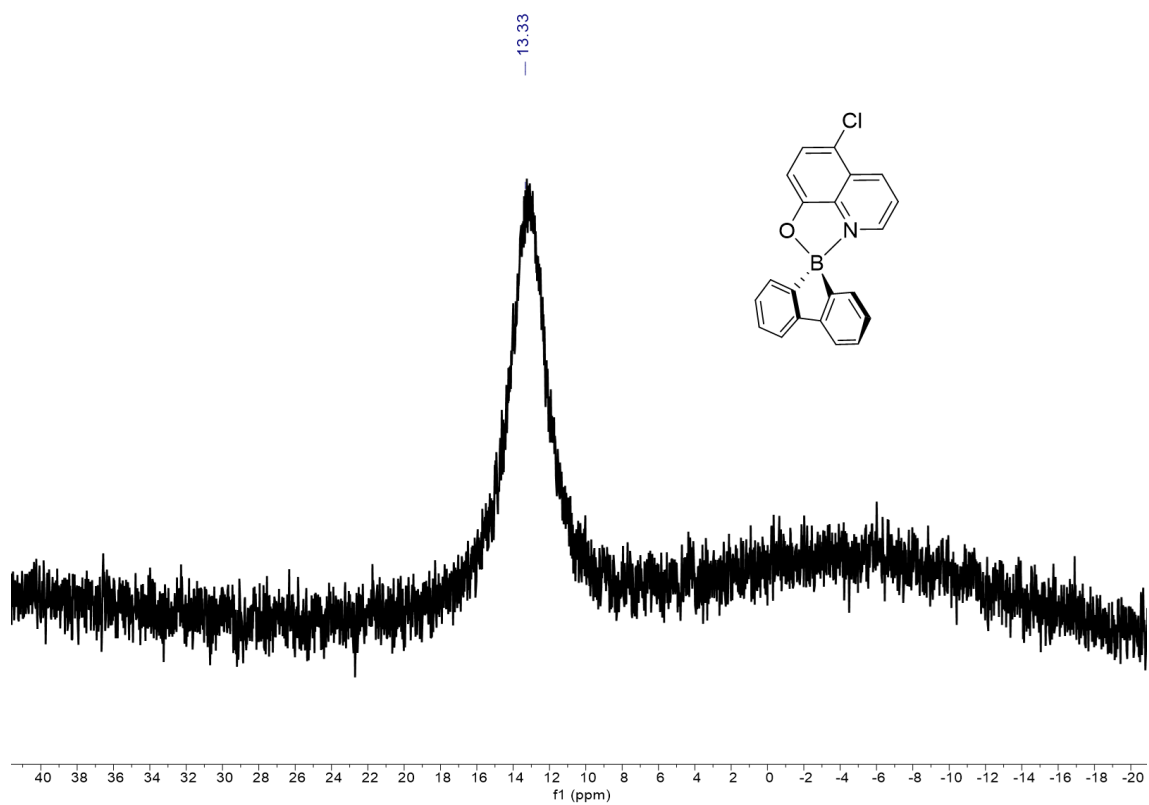

**Figure S14**  $^{11}\text{B}$  NMR (THF- $d_8$ , 96 MHz) spectrum of complex **3d**.

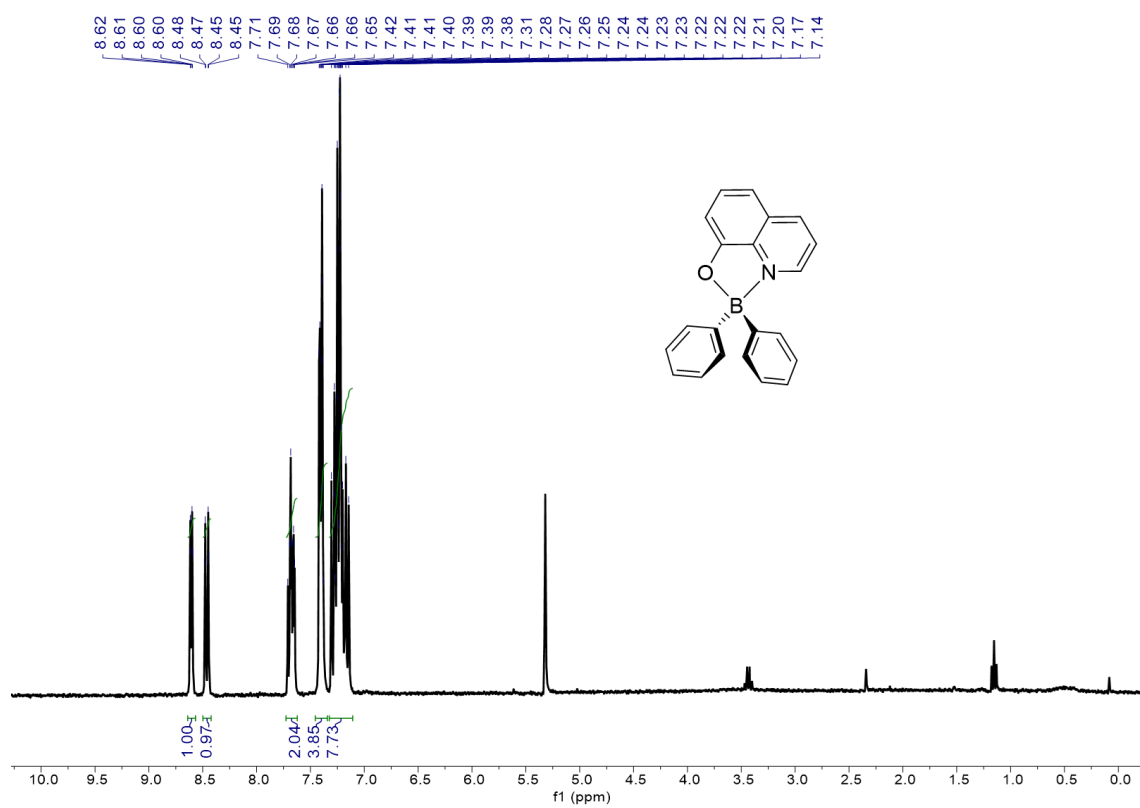

**Figure S15**  $^1\text{H}$  NMR ( $\text{CD}_2\text{Cl}_2$ , 300 MHz) spectrum of complex **4a**.

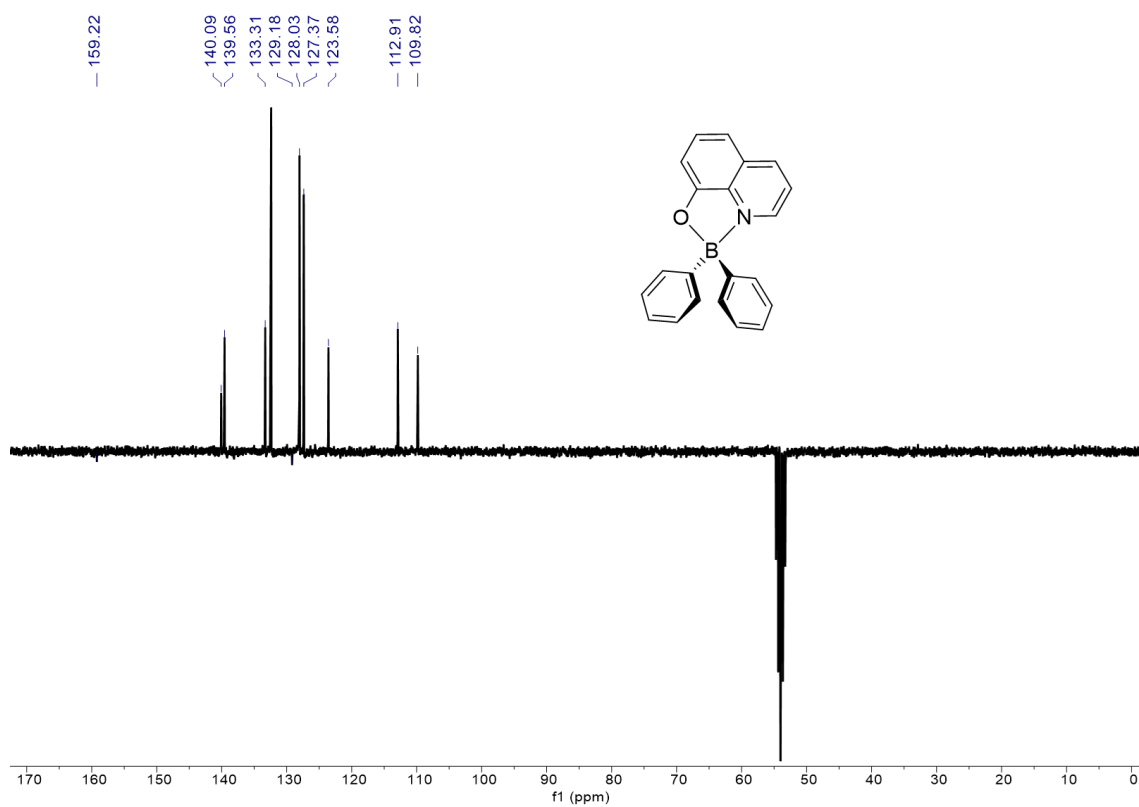

**Figure S16**  $^{13}\text{C}$  APT NMR ( $\text{CD}_2\text{Cl}_2$ , 75 MHz) spectrum of complex **4a**.

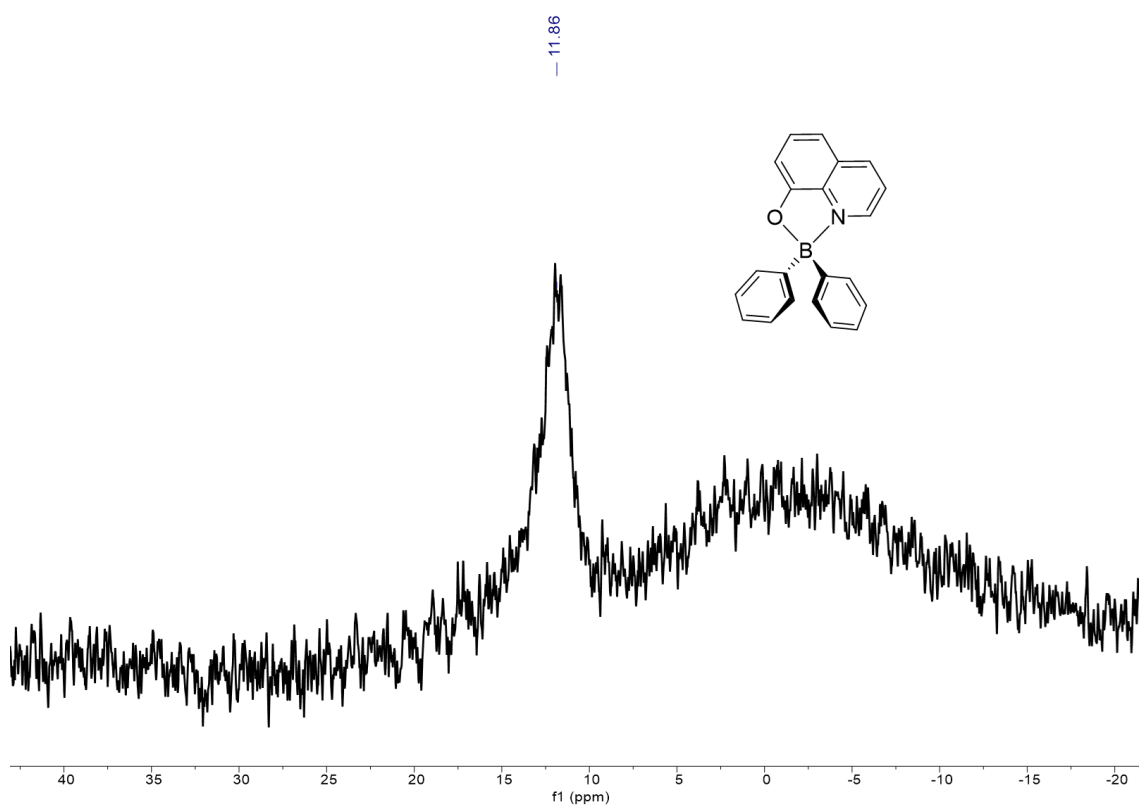

**Figure S17**  $^{11}\text{B}$  NMR ( $\text{CD}_2\text{Cl}_2$ , 96 MHz) spectrum of complex **4a**.

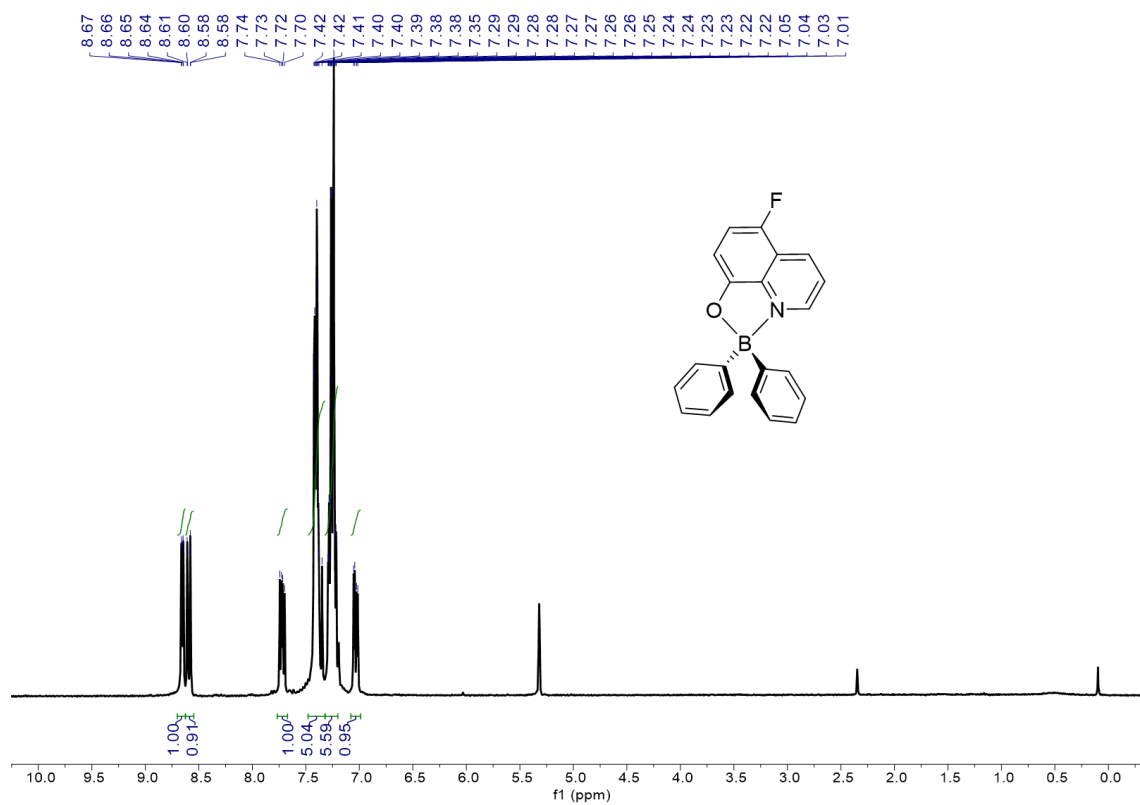

**Figure S18**  $^1\text{H}$  NMR ( $\text{CD}_2\text{Cl}_2$ , 300 MHz) spectrum of complex **4b**.

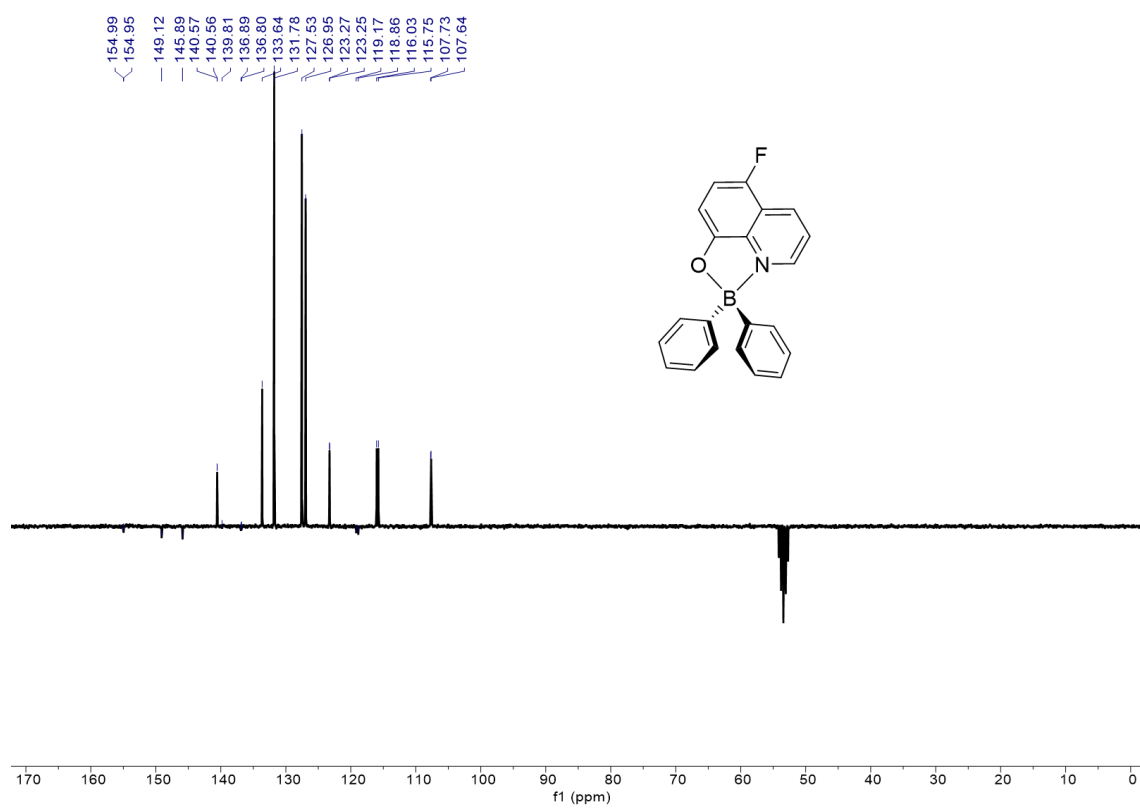

**Figure S19**  $^{13}\text{C}$  APT NMR ( $\text{CD}_2\text{Cl}_2$ , 75 MHz) spectrum of complex **4b**.

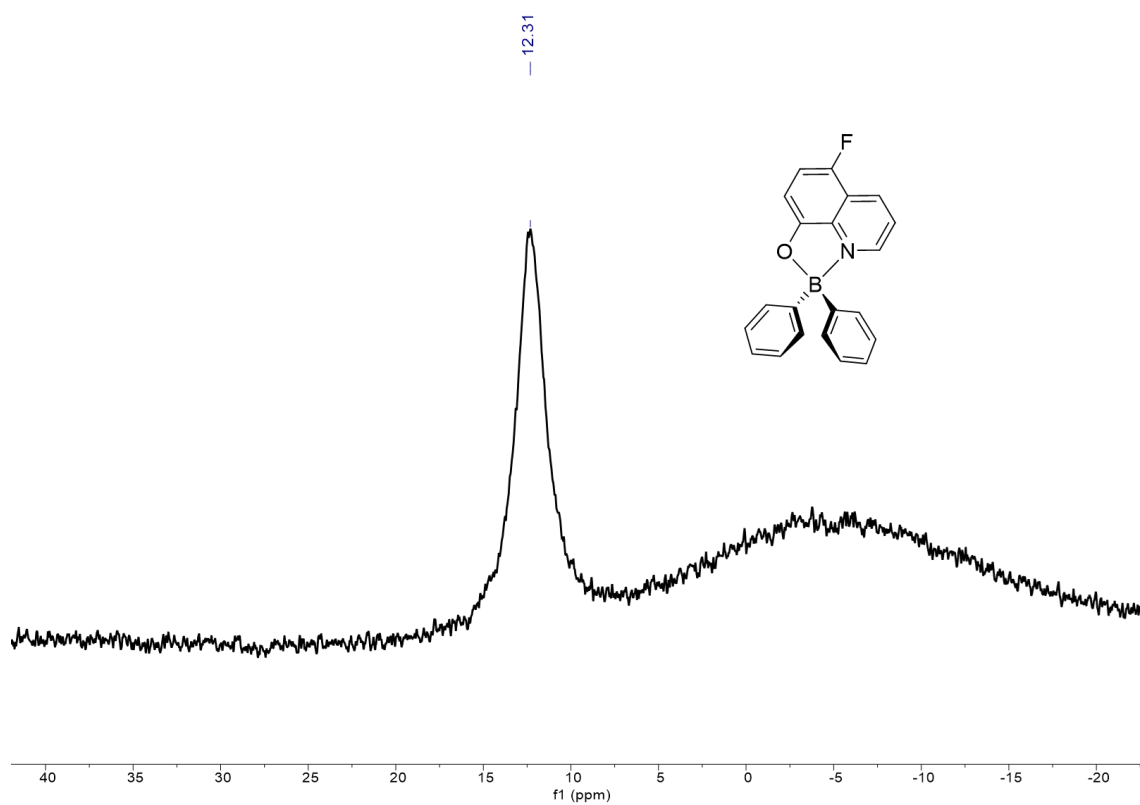

**Figure S20**  $^{11}\text{B}$  NMR ( $\text{CD}_2\text{Cl}_2$ , 96 MHz) spectrum of complex **4b**.

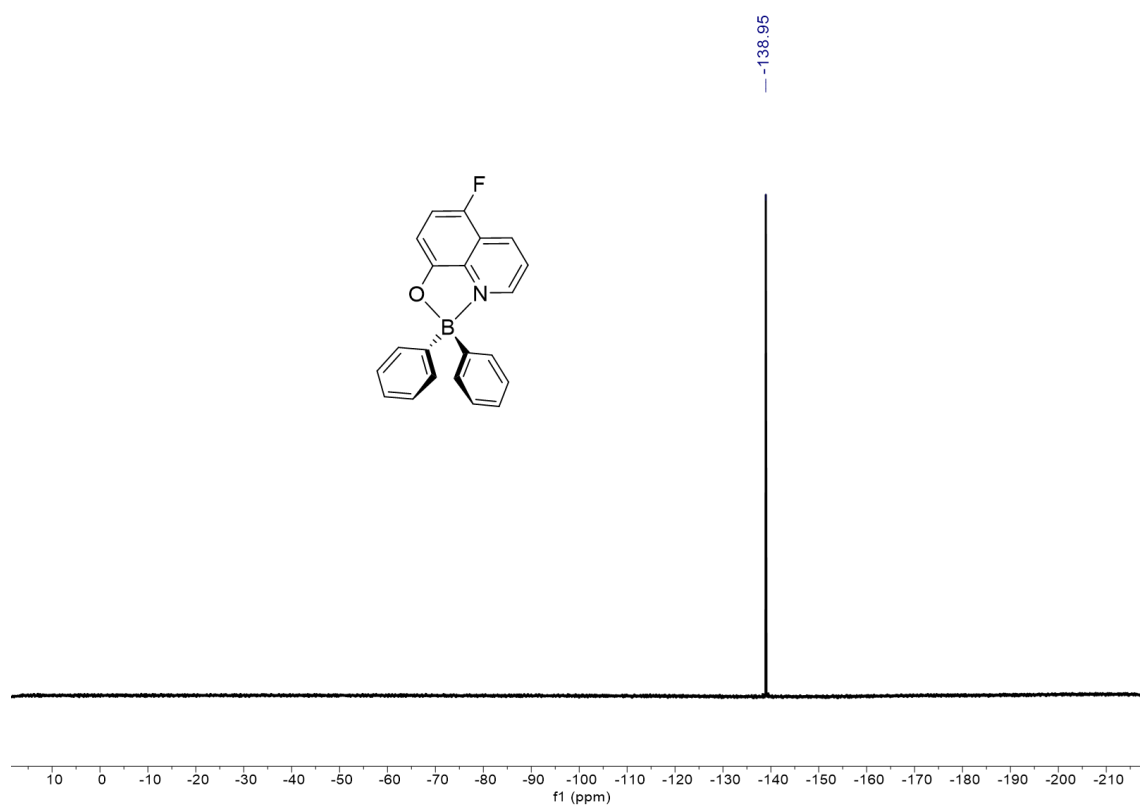

**Figure S21**  $^{19}\text{F}\{^1\text{H}\}$  NMR ( $\text{CD}_2\text{Cl}_2$ , 282 MHz) spectrum of complex **4b**.

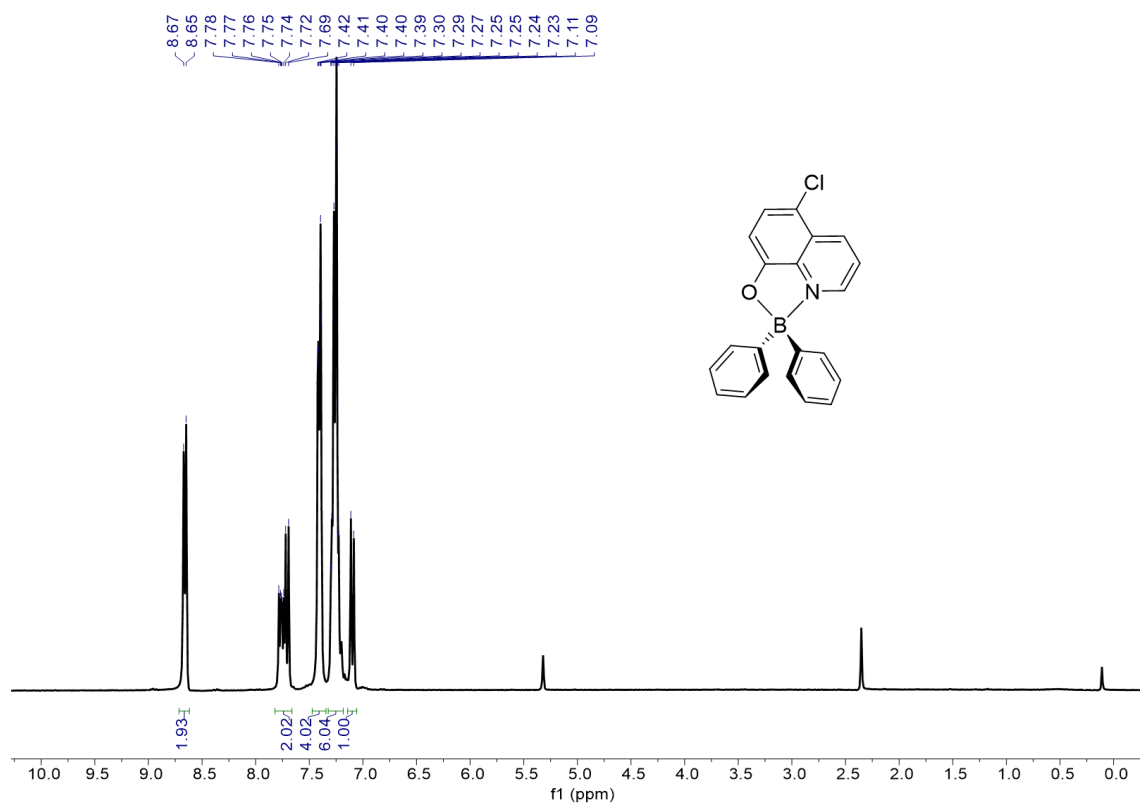

**Figure S22**  $^1\text{H NMR}$  (CD $_2$ Cl $_2$ , 300 MHz) spectrum of complex **4c**.

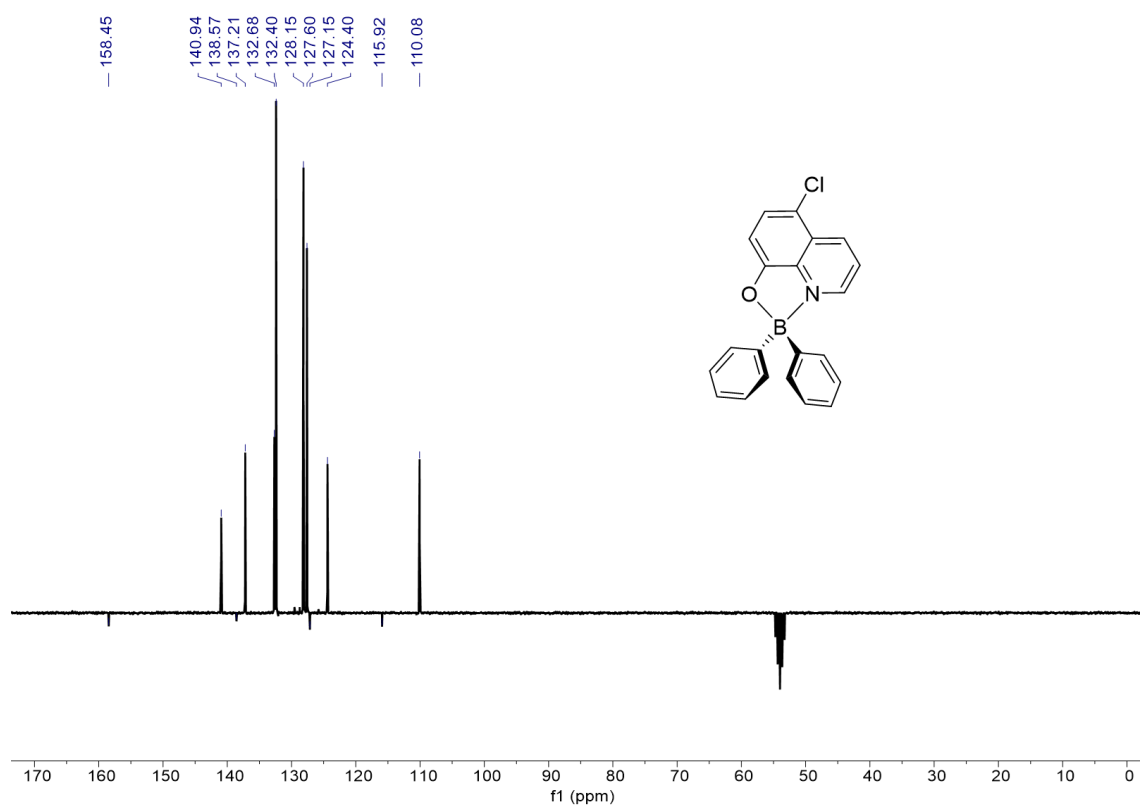

**Figure S23**  $^{13}\text{C APT NMR}$  (CD $_2$ Cl $_2$ , 75 MHz) spectrum of complex **4c**.



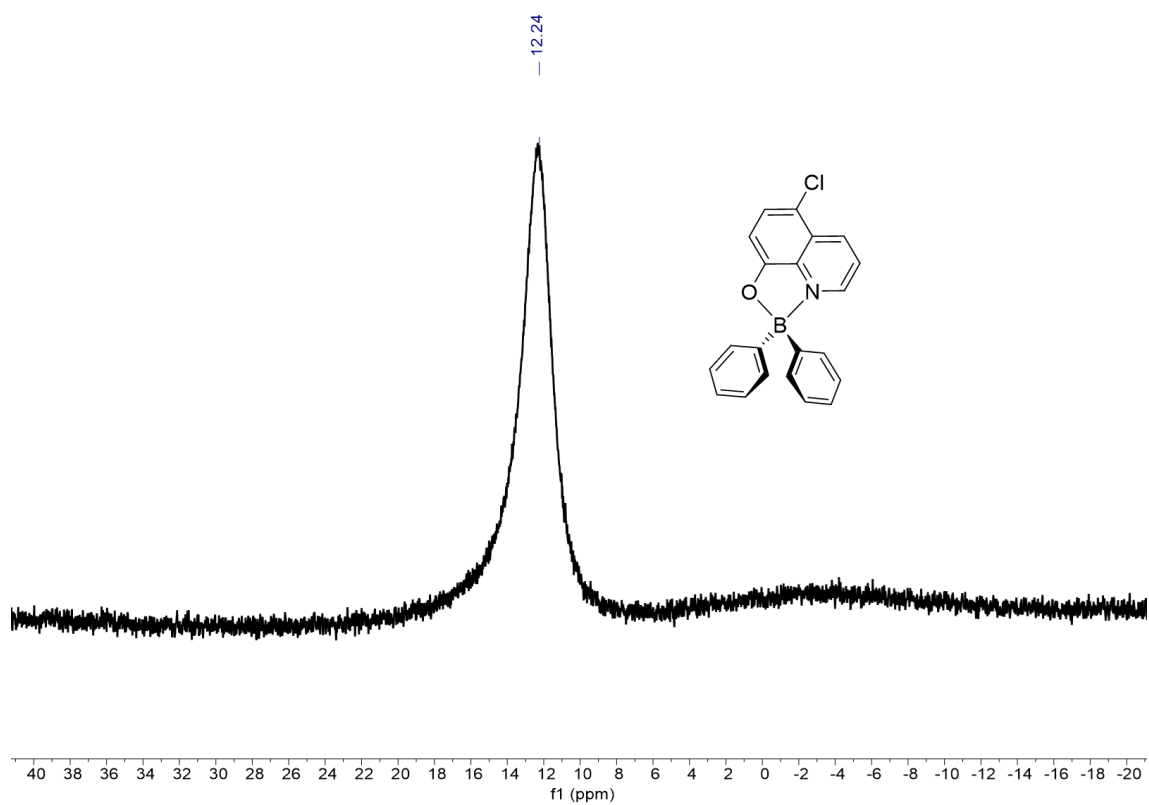

Figure S24  $^{11}\text{B}$  NMR ( $\text{CD}_2\text{Cl}_2$ , 96 MHz) spectrum of complex **4c**.

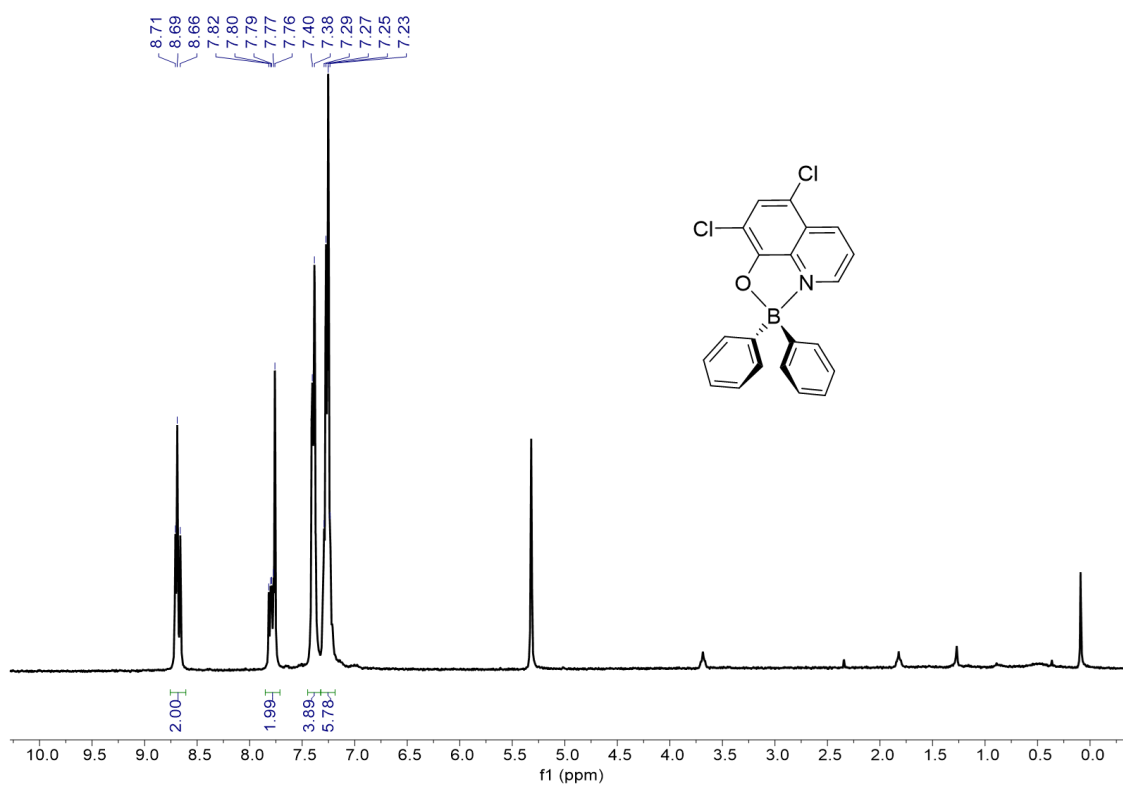

Figure S25  $^1\text{H}$  NMR ( $\text{CD}_2\text{Cl}_2$ , 300 MHz) spectrum of complex **4d**.

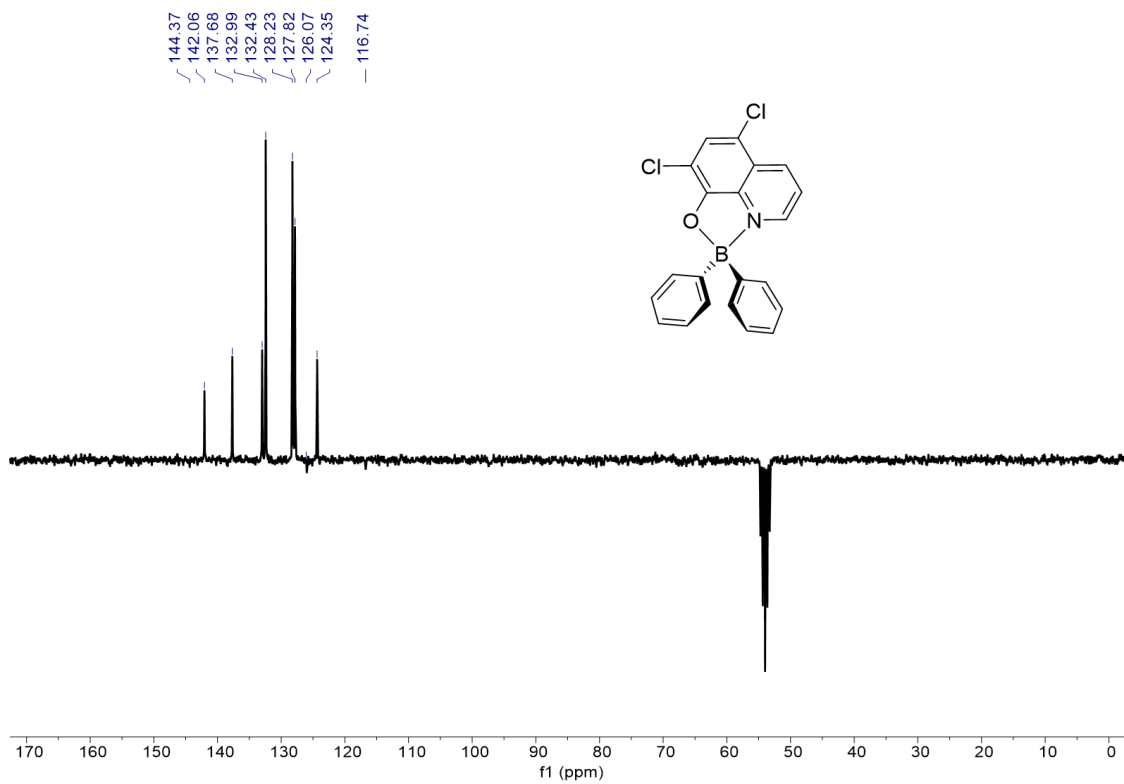

Figure S26  $^{13}\text{C}$  APT NMR ( $\text{CD}_2\text{Cl}_2$ , 75 MHz) spectrum of complex **4d**.

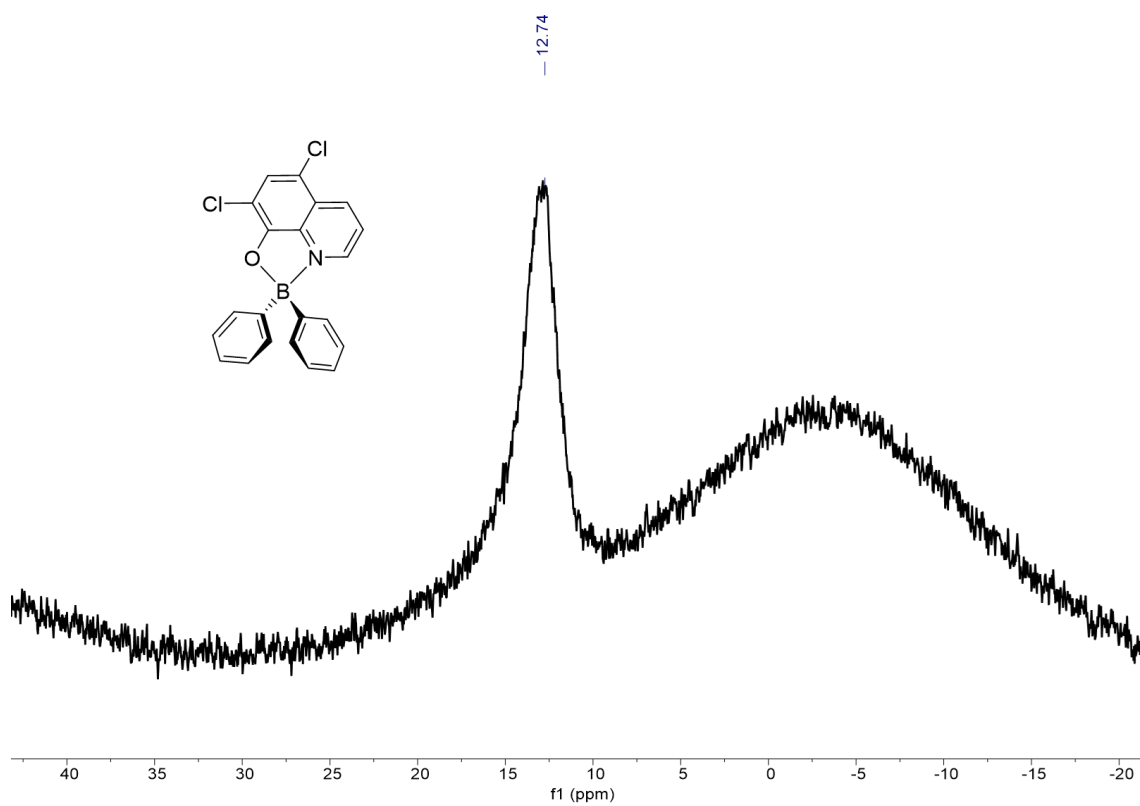

Figure S27  $^{11}\text{B}$  NMR ( $\text{CD}_2\text{Cl}_2$ , 96 MHz) spectrum of complex **4d**.

# Absorption and emission spectra of complexes 3a-d and 4a-d in THF solution and in ZEONEX film

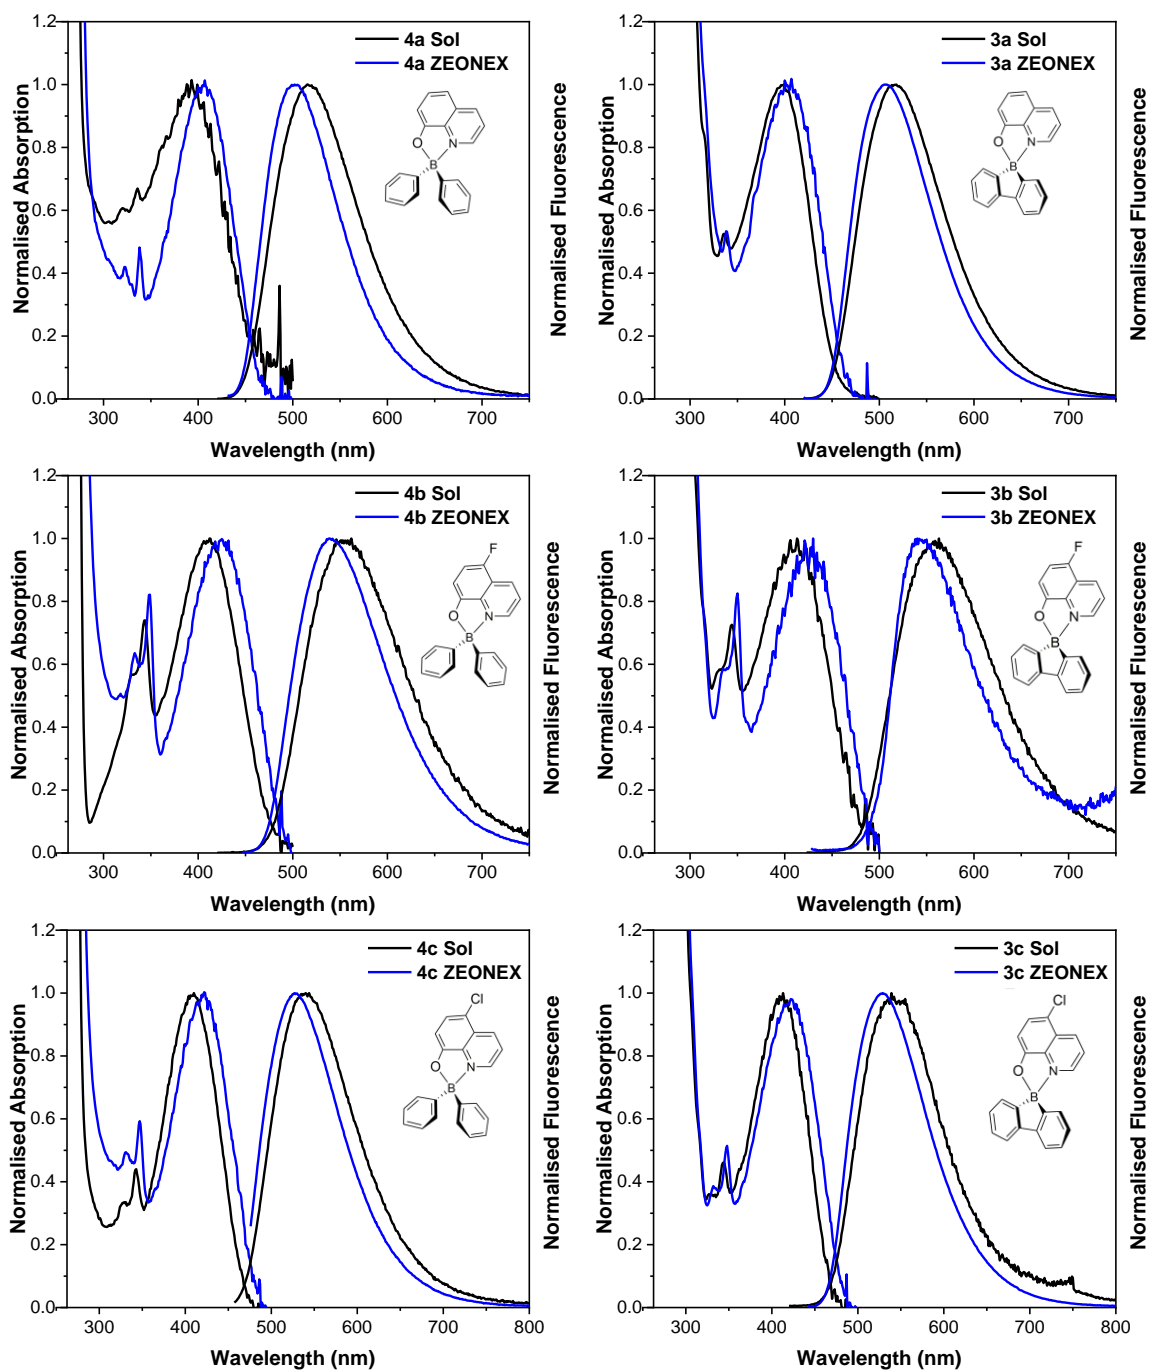

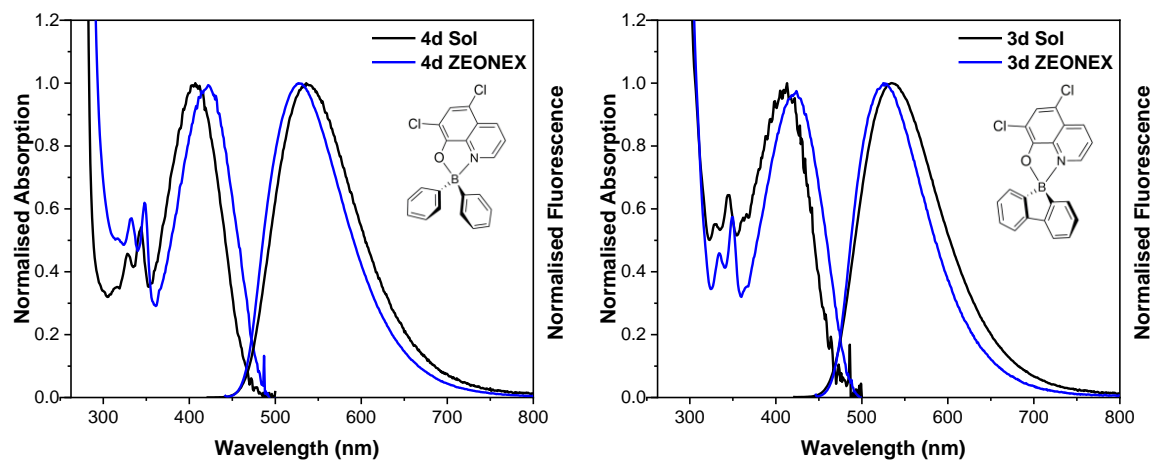

**Figure S28** Normalised absorption and emission spectra of complexes **3a-d** and **4a-d** in THF solution ( $OD_{\max} < 0.2$  at  $\lambda_{\text{abs}}^{\max}$ ;  $c < 8 \times 10^{-5}$  M) and in film (ZEONEX 480R, 1% wt), at 293 K.

**Absorption and emission spectra of complexes 3a and 4a  
in solvents of different polarity**

**Table S4** Absorption and emission maxima of complexes **3a** and **4a** and corresponding Stokes shifts in solvents of different polarity (dielectric constant  $\epsilon$ ; dipole moment  $\mu$ ).

| Solvent         | $\epsilon$ | $\mu$ | Complex <b>3a</b>                |                            |                           | Complex <b>4a</b>                |                            |                           |
|-----------------|------------|-------|----------------------------------|----------------------------|---------------------------|----------------------------------|----------------------------|---------------------------|
|                 |            |       | Stokes shift (cm <sup>-1</sup> ) | $\lambda_{abs}^{max}$ (nm) | $\lambda_{em}^{max}$ (nm) | Stokes shift (cm <sup>-1</sup> ) | $\lambda_{abs}^{max}$ (nm) | $\lambda_{em}^{max}$ (nm) |
| ZEONEX 480R     | 2.34       | -     | 4929                             | 405                        | 506                       | 4650                             | 407                        | 502                       |
| Toluene         | 2.379      | 0.31  | 5583                             | 400                        | 515                       | 5507                             | 400                        | 513                       |
| Dichloromethane | 9.08       | 1.14  | 5772                             | 397                        | 515                       | 5888                             | 394                        | 513                       |
| THF             | 7.58       | 1.75  | 5809                             | 397                        | 516                       | 6102                             | 393                        | 517                       |
| Acetonitrile    | 38.8       | 3.44  | 6579                             | 388                        | 521                       | 6431                             | 388                        | 517                       |

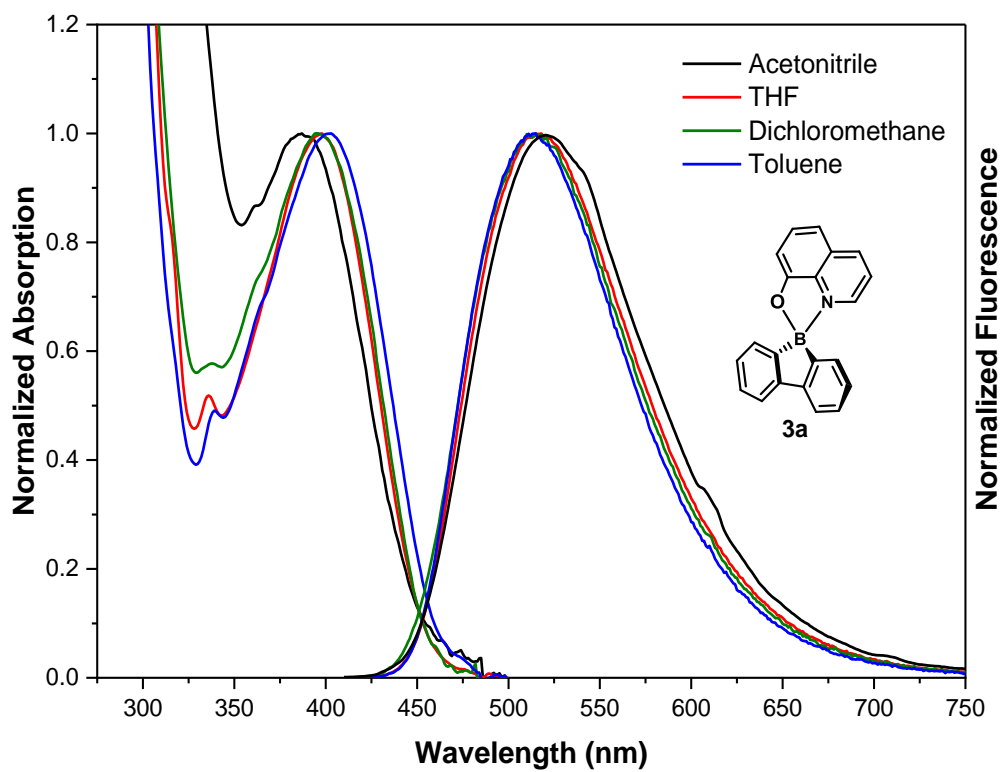

**Figure S29** Normalised absorption and emission spectra of solutions of complex **3a** at 293 K. Solvents are indicated in the figure legend.

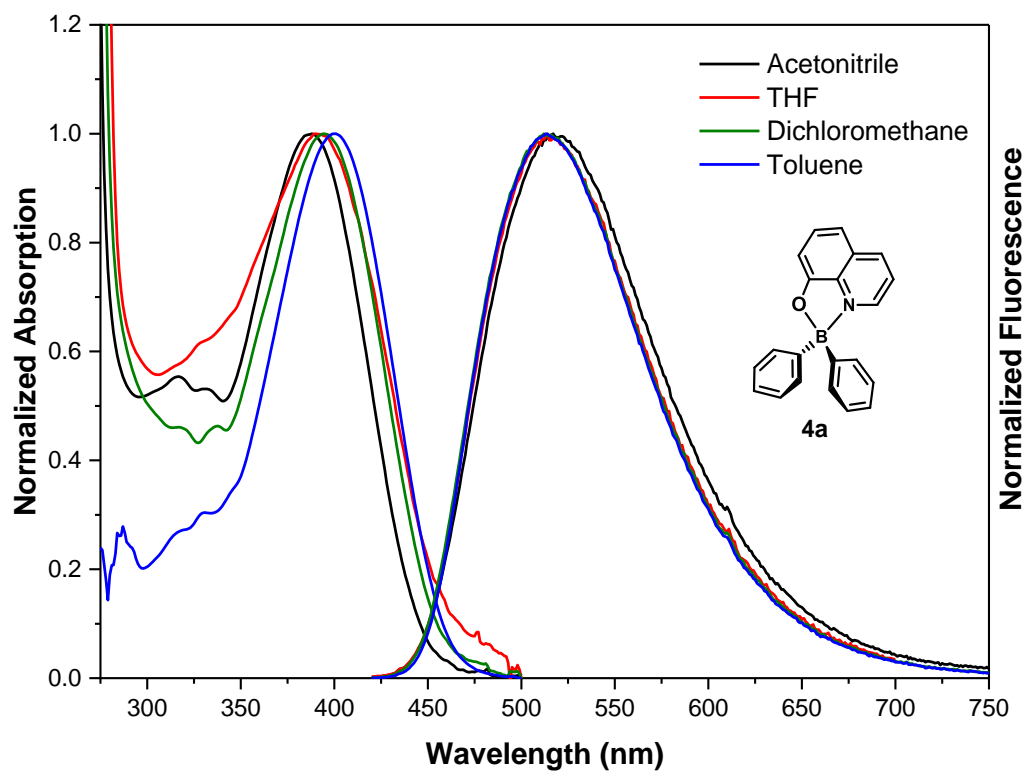

**Figure S30** Normalised absorption and emission spectra of solutions of complex **4a** at 293 K. Solvents are indicated in the figure legend.

## Computational studies

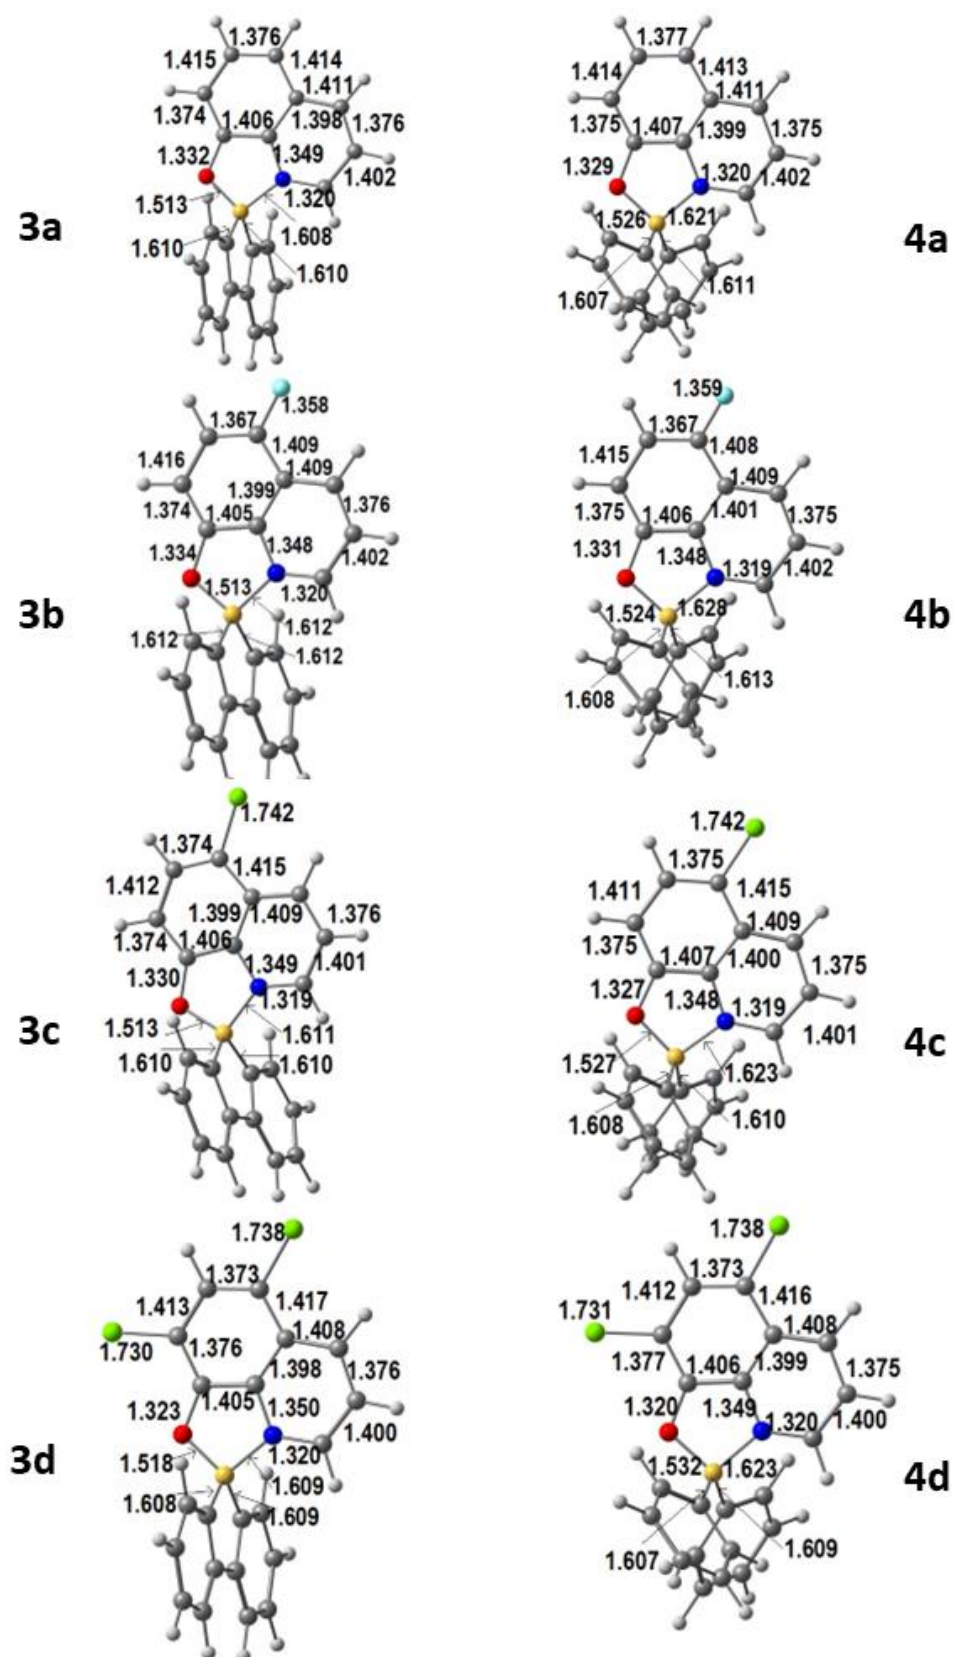

Figure S31 Optimised geometries of complexes 3a-3d and 4a-4b in the  $S_0$  state (ground state) with relevant distances (Å).

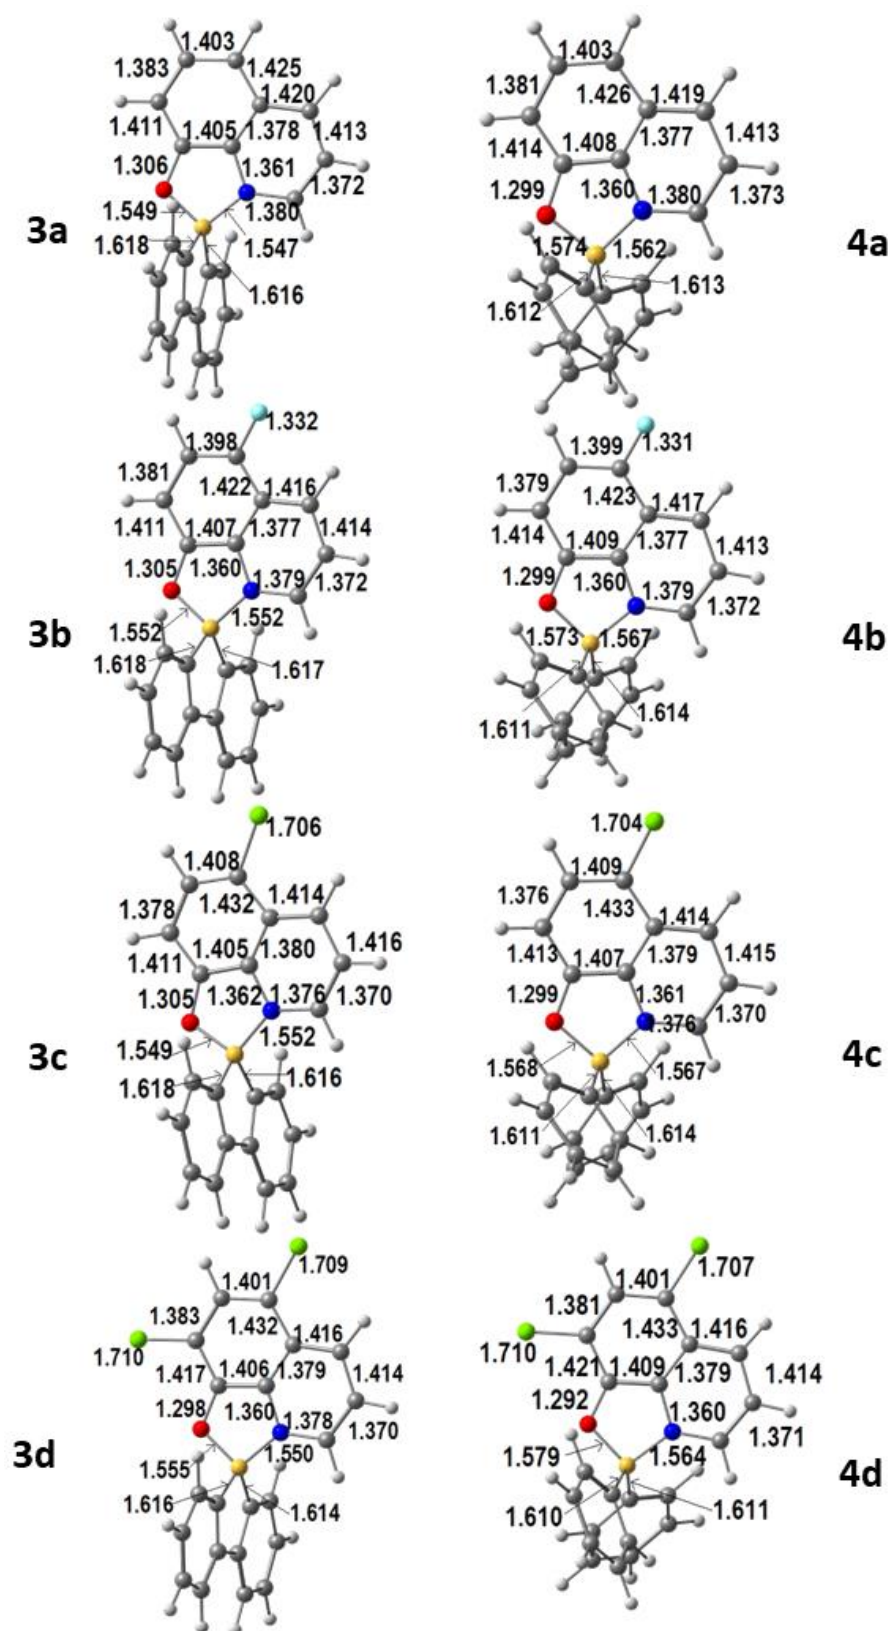

**Figure S32** Optimised geometries of complexes **3a-3d** and **4a-4b** in the  $S_1$  state (first singlet excited state) with relevant distances (Å).



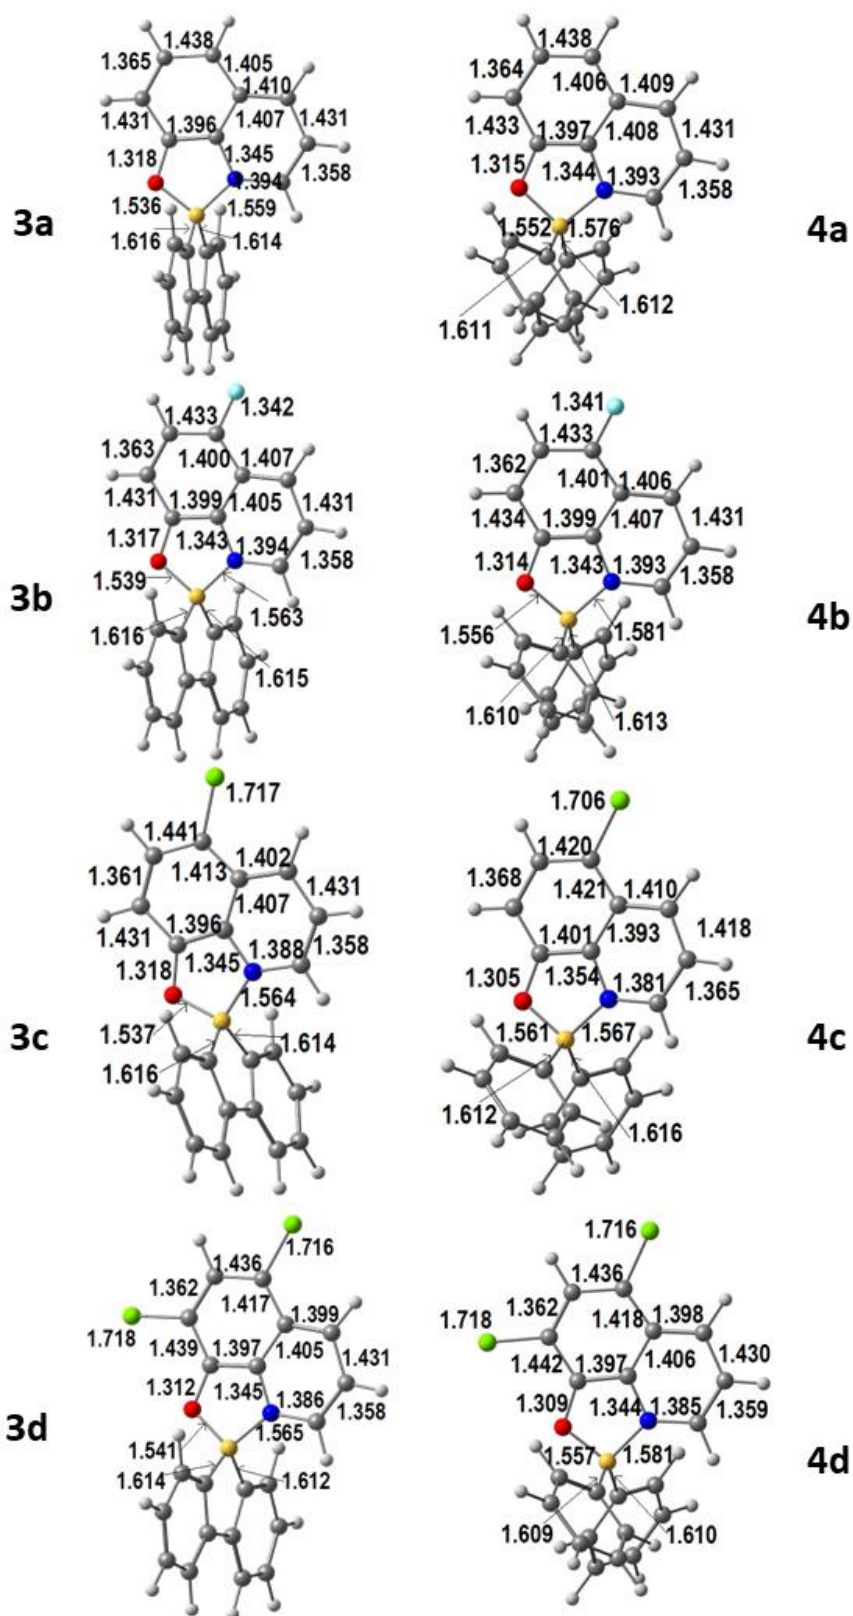

**Figure S33** Optimised geometries of complexes **3a-3d** and **4a-4b** in the  $T_1$  state (first triplet excited state) with relevant distances (Å).

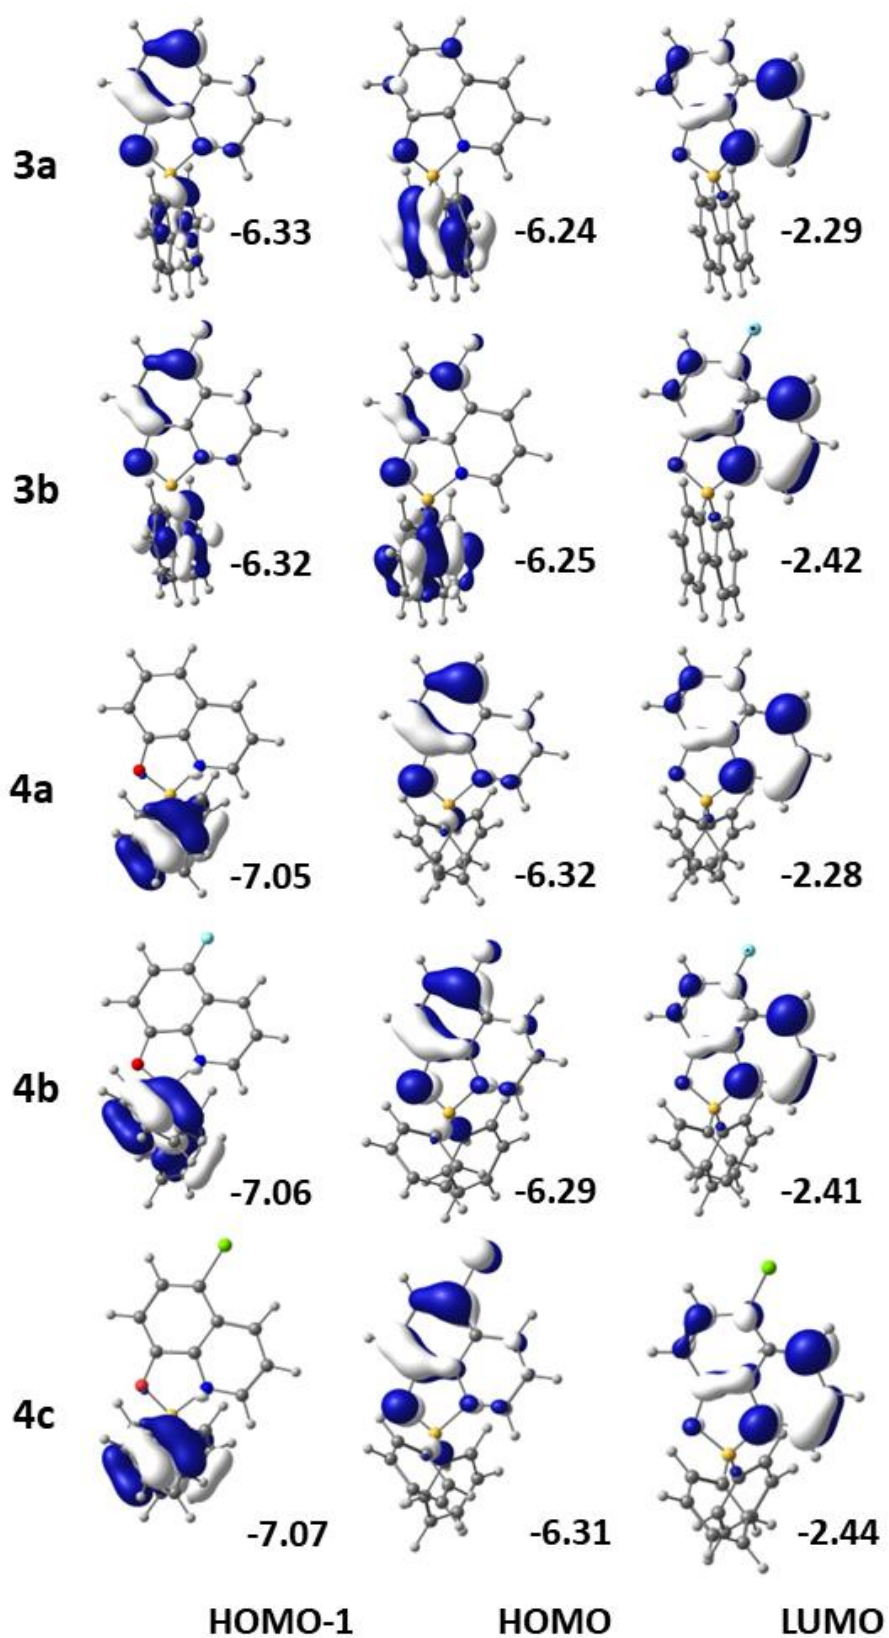

**Figure S34** Frontier molecular orbitals (HOMO-1, HOMO and LUMO) of complexes **3a-3b** and **4a-4c**, with their energies in eV.

**Table S5** Calculated HOMOs and LUMOs energies (eV) for complexes **3a-3d** and **4a-4d** using different methods.

|           | GP      |         | THF     |         | CH <sub>2</sub> Cl <sub>2</sub> |         | A       |         | A/D3    |         | B       |         | B/D3    |         |
|-----------|---------|---------|---------|---------|---------------------------------|---------|---------|---------|---------|---------|---------|---------|---------|---------|
|           | HOMO    | LUMO    | HOMO    | LUMO    | HOMO                            | LUMO    | HOMO    | LUMO    | HOMO    | LUMO    | HOMO    | LUMO    | HOMO    | LUMO    |
| <b>3a</b> | -0.2707 | -0.0995 | -0.2709 | -0.0993 | -0.2568                         | -0.1021 | -0.2559 | -0.1018 | -0.2259 | -0.1459 | -0.2320 | -0.1317 | -0.2321 | -0.1310 |
| <b>3b</b> | -0.2709 | -0.1049 | -0.2710 | -0.1046 | -0.2564                         | -0.1080 | -0.2565 | -0.1076 | -0.2285 | -0.1531 | -0.2304 | -0.1410 | -0.2301 | -0.1402 |
| <b>3c</b> | -0.2714 | -0.1062 | -0.2716 | -0.1060 | -0.2568                         | -0.1088 | -0.2570 | -0.1085 | -0.2298 | -0.1541 | -0.2308 | -0.1398 | -0.2326 | -0.1415 |
| <b>3d</b> | -0.2728 | -0.1102 | -0.2730 | -0.1101 | -0.2580                         | -0.1128 | -0.2581 | -0.1126 | -0.2326 | -0.1606 | -0.2353 | -0.1458 | -0.2349 | -0.1449 |
| <b>4a</b> | -0.2741 | -0.0990 | -0.2741 | -0.0989 | -0.2603                         | -0.1015 | -0.2604 | -0.1013 | -0.2367 | -0.1458 | -0.2345 | -0.1360 | -0.2343 | -0.1353 |
| <b>4b</b> | -0.2729 | -0.1043 | -0.2729 | -0.1042 | -0.2602                         | -0.1071 | -0.2603 | -0.1068 | -0.2358 | -0.1529 | -0.2314 | -0.1408 | -0.2311 | -0.1401 |
| <b>4c</b> | -0.2735 | -0.1057 | -0.2736 | -0.1055 | -0.2607                         | -0.1082 | -0.2607 | -0.1082 | -0.2394 | -0.1545 | -0.2339 | -0.1421 | -0.2335 | -0.1530 |
| <b>4d</b> | -0.2765 | -0.1096 | -0.2766 | -0.1095 | -0.2640                         | -0.1120 | -0.2642 | -0.1119 | -0.2436 | -0.1603 | -0.2366 | -0.1454 | -0.2362 | -0.1446 |

**A** – PBE0, TZP (all electron), THF, SO

**A/D3** – PBE0/D3, TZP (all electron), THF, SO

**B** – B3LYP, TZP (all electron), THF, SO

**B/D3** – B3LYP/D3, TZP (all electron), THF, SO

**GP** – BP86 (small core, T2ZP)

**THF** – BP86 (small core, T2ZP), THF (single point)

**CH<sub>2</sub>Cl<sub>2</sub>** – BP86 (small core, T2ZP), dichloromethane (single point)

**Table S6.** DFT calculated (THF and vacuum) and experimental (THF and ZEONEX 480R) values of wavelength maximum ( $\lambda_{abs}^{max}$ ) of the absorption band of boron complexes **3a-3d** and **4a-4d**, and their dipole moments in S<sub>0</sub>, non-relaxed S<sub>1</sub><sup>'</sup>, and S<sub>1</sub> states.

| Complex   | R <sup>1</sup> | R <sup>2</sup> | $\lambda_{abs}^{max}$ (nm) |      | $\lambda_{abs}^{max}$ (nm) |        | $\mu$ (D)      |                |                              |
|-----------|----------------|----------------|----------------------------|------|----------------------------|--------|----------------|----------------|------------------------------|
|           |                |                | THF                        |      | ZEONEX 480R                | vacuum | S <sub>0</sub> | S <sub>1</sub> | S <sub>1</sub> <sup>'a</sup> |
|           |                |                | exp                        | calc | exp                        | calc   | calc           | calc           | calc                         |
| <b>4a</b> | H              | H              | 397                        | 383  | 407                        | 402    | 7.60           | 7.63           | 6.08                         |
| <b>3a</b> | H              | H              | 397                        | 378  | 405                        | 398    | 8.10           | 8.81           | 5.98                         |
| <b>4b</b> | F              | H              | 412                        | 399  | 423                        | 418    | 5.96           | 6.33           | 4.36                         |
| <b>3b</b> | F              | H              | 413                        | 401  | 424                        | 418    | 6.42           | 6.82           | 4.30                         |
| <b>4c</b> | Cl             | H              | 409                        | 400  | 422                        | 417    | 5.79           | 5.96           | 5.05                         |
| <b>3c</b> | Cl             | H              | 413                        | 399  | 422                        | 414    | 6.23           | 6.44           | 4.95                         |
| <b>4d</b> | Cl             | Cl             | 407                        | 401  | 422                        | 417    | 7.48           | 7.57           | 4.82                         |
| <b>3d</b> | Cl             | Cl             | 411                        | 400  | 422                        | 423    | 7.86           | 8.04           | 4.70                         |

<sup>a</sup> S<sub>1</sub><sup>'</sup> is the non-relaxed singlet excited state (calculated at the S<sub>0</sub> relaxed geometry).

## Transient emission spectra of complexes 3b, 3c, 4b and 4c in solid films

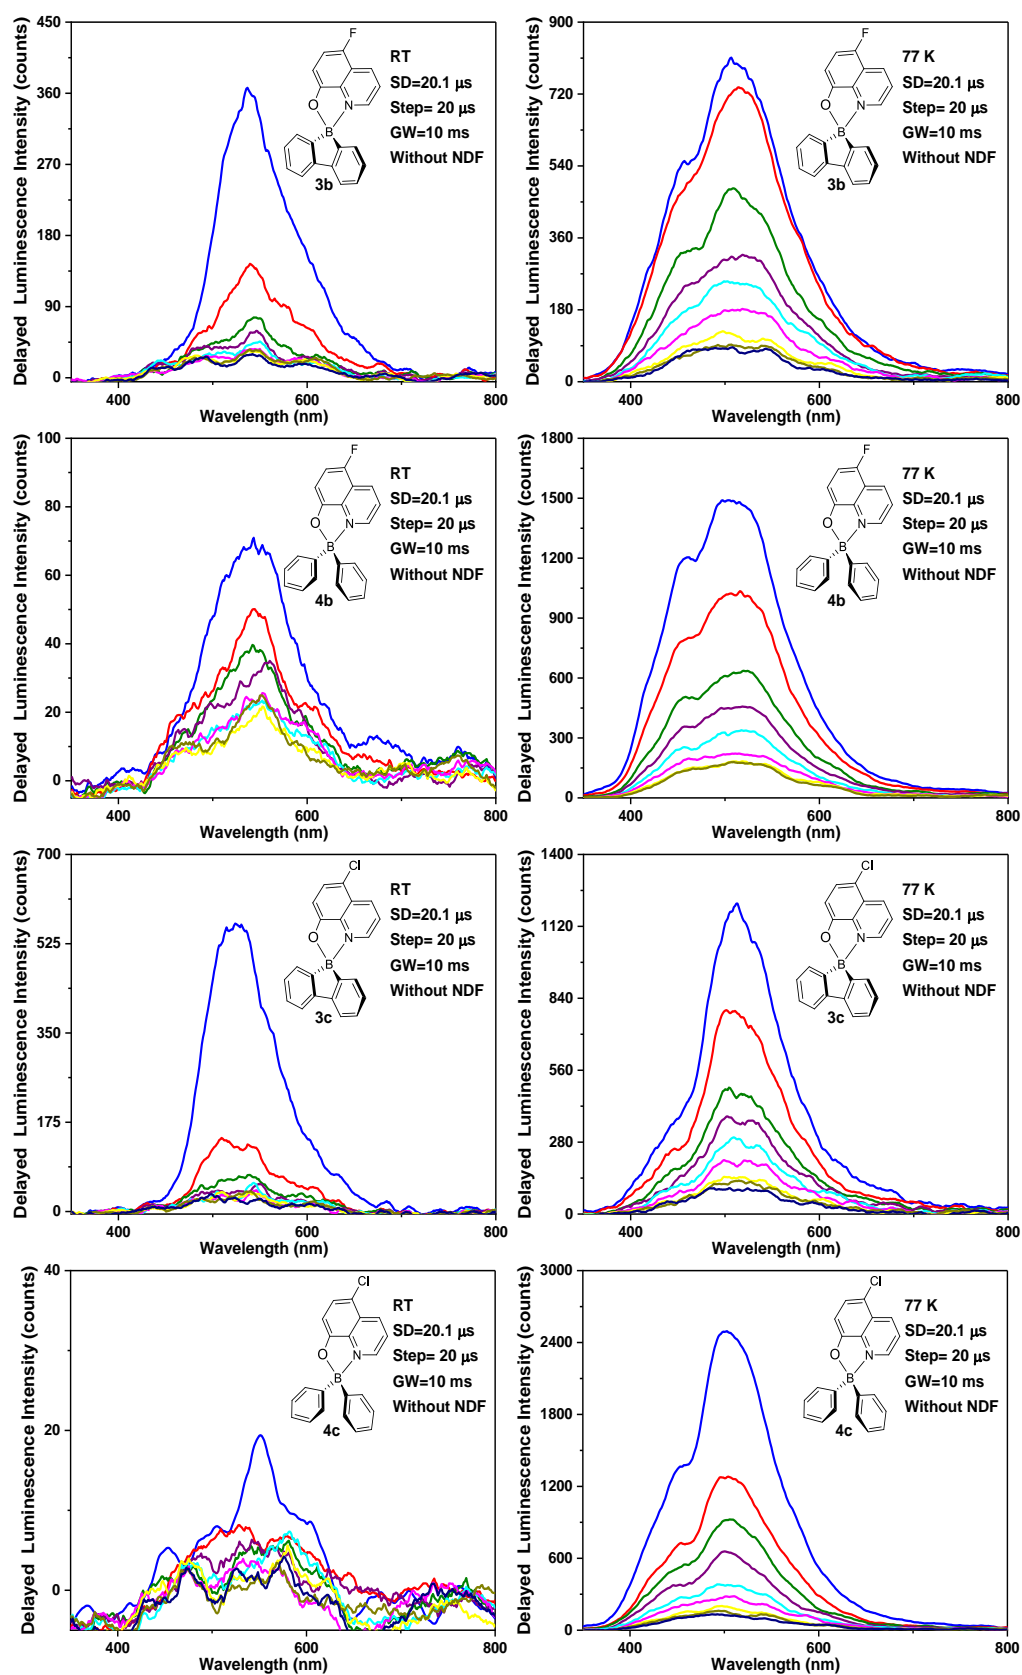

**Figure S35** Transient emission spectra of complexes **3b,c** and **4b,c** in ZEONEX 480R films (1% wt) at room temperature (ca. 293 K) (left) and at 77 K (right). All spectra were recorded with a start delay (SD) of 20.1  $\mu$ s (blue curve) and recorded every 20  $\mu$ s (Step), with the use of a large gate width (GW=10 ms).

## Electroluminescent devices

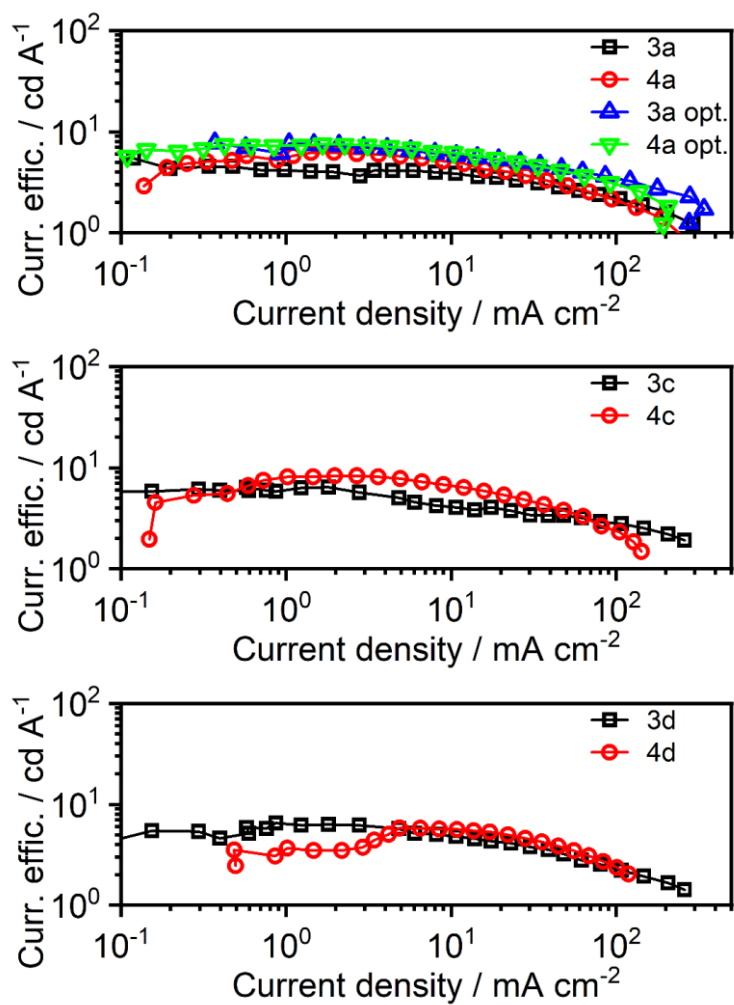

Figure S36 Characteristics of OLED devices: current efficiency vs. current density.

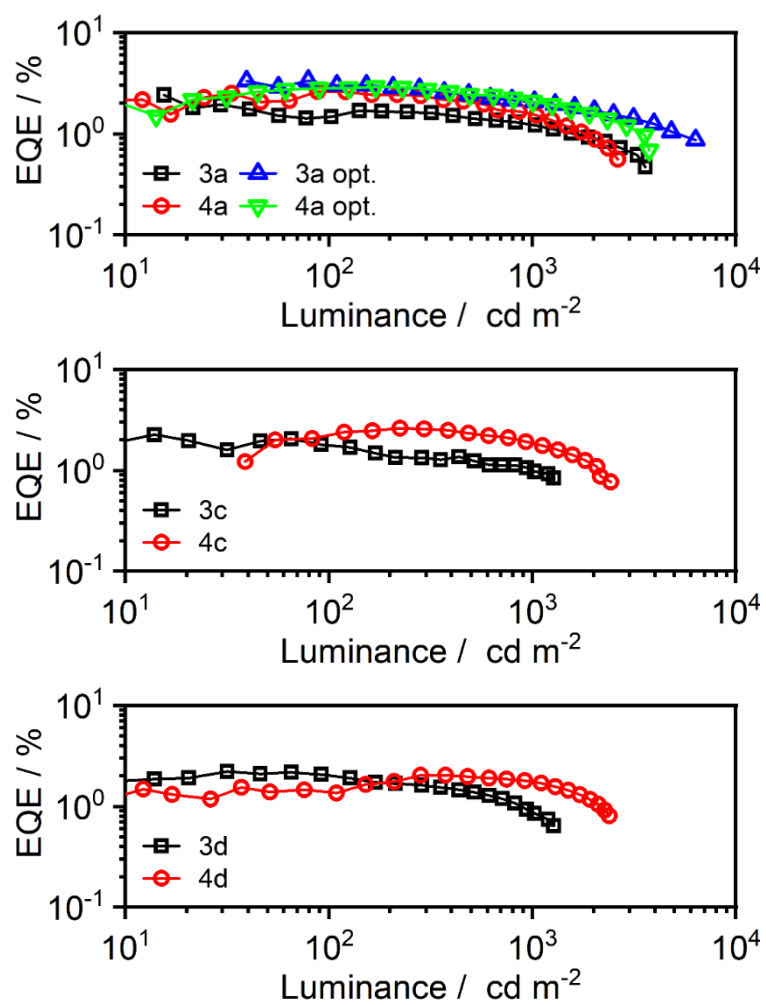

**Figure S37** Characteristics of OLED devices: external quantum efficiency (EQE) vs. luminance.

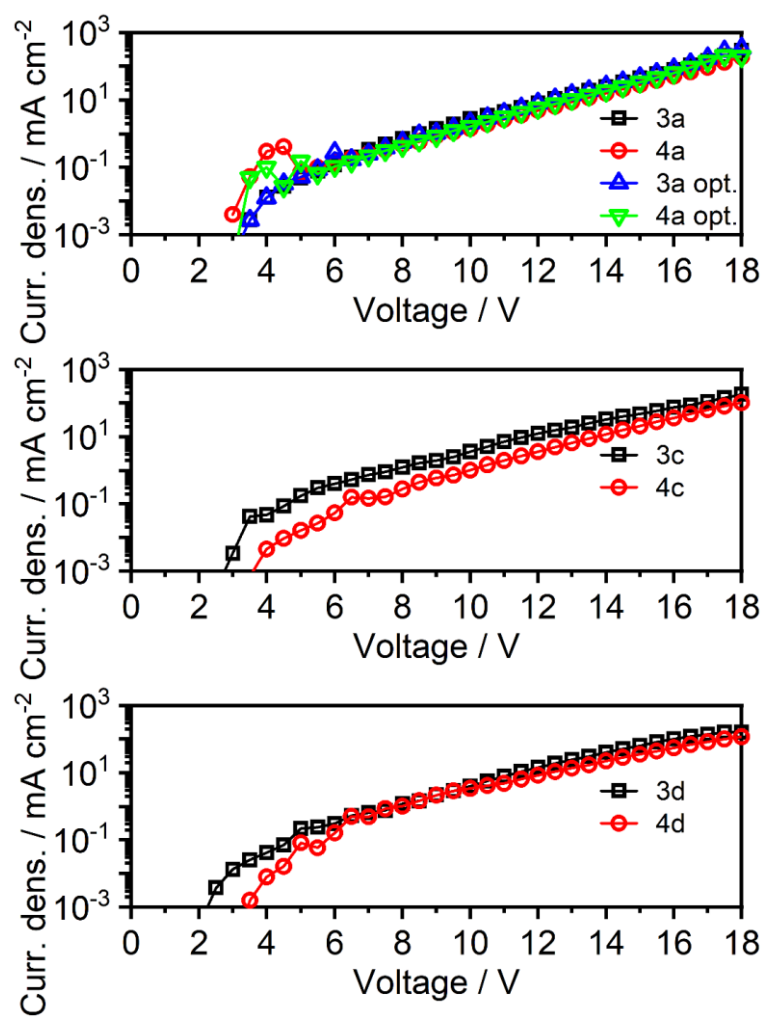

**Figure S38** Characteristics of OLED devices: current density vs. voltage.

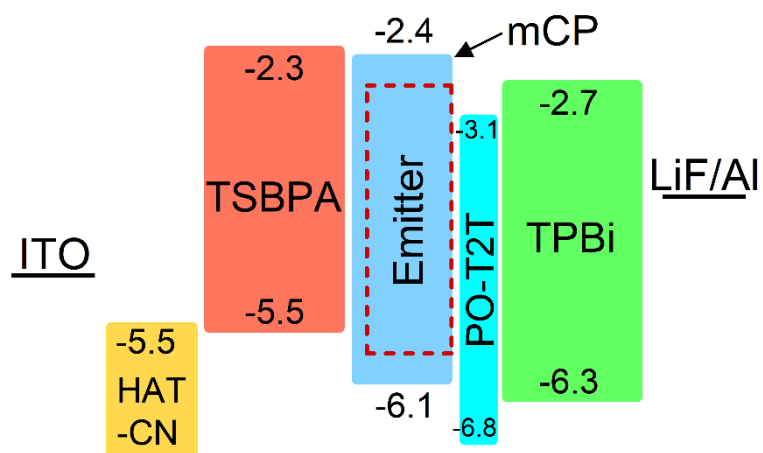

**Figure S3839** Graphical representation of the architecture of OLEDs **3a**, **3c**, **3d**, **4a**, **4c**, and **4d**: ITO | HAT-CN (10 nm) | TSBPA (40 nm) | mCP (2 nm) | mCP co 10% **emitter** (20 nm) | PO-T2T (5 nm) | TPBi (40 nm) | LiF (0.8 nm) | Al (100 nm). Numerical values represent the HOMO (bottom) and LUMO (top) energy of the respective molecule.

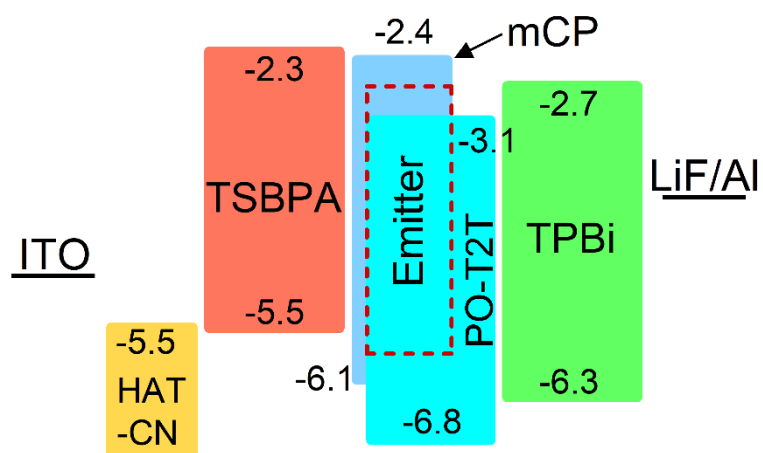

**Figure S40** Graphical representation of the architecture of OLEDs **3a opt.** and **4a opt.**: ITO | HAT-CN (10 nm) | TSBPA (40 nm) | mCP (2 nm) | mCP:PO-T2T (80:20) co 10% **emitter** | PO-T2T (5 nm) | TPBi (40 nm) | LiF (0.8 nm) | Al (100 nm). Numerical values represent the HOMO (bottom) and LUMO (top) energy of the respective molecule.
